# Supplementary material
Source: MDPI journal article supplement (https://www.mdpi.com/2073-4344/13/4/648)
Supplement: s1 [file s1]

## *Supporting Information*

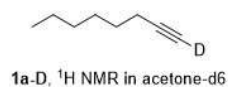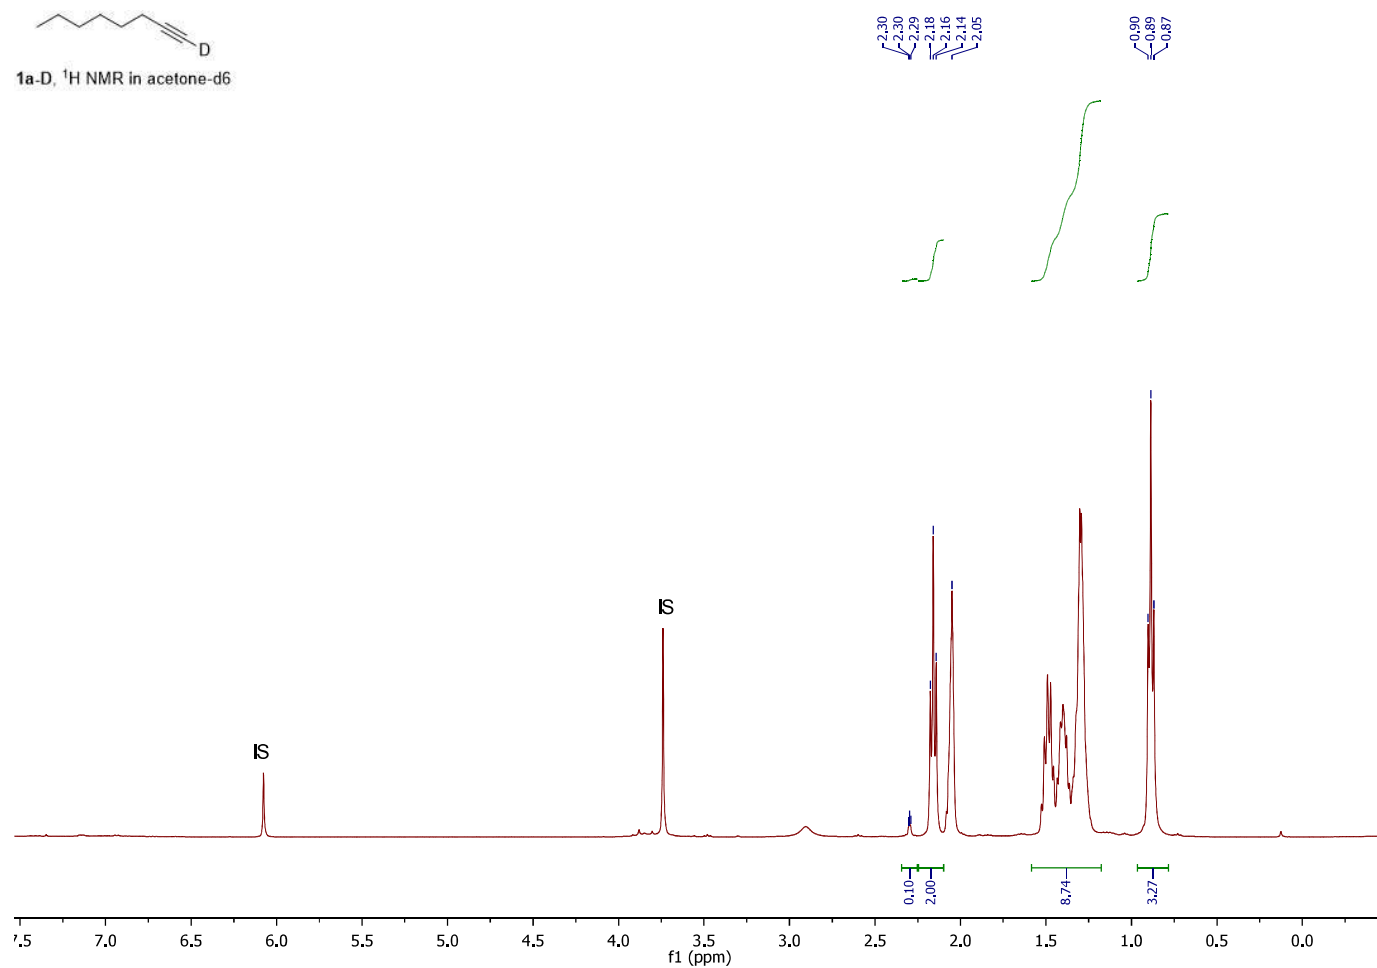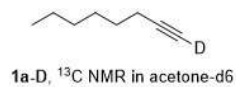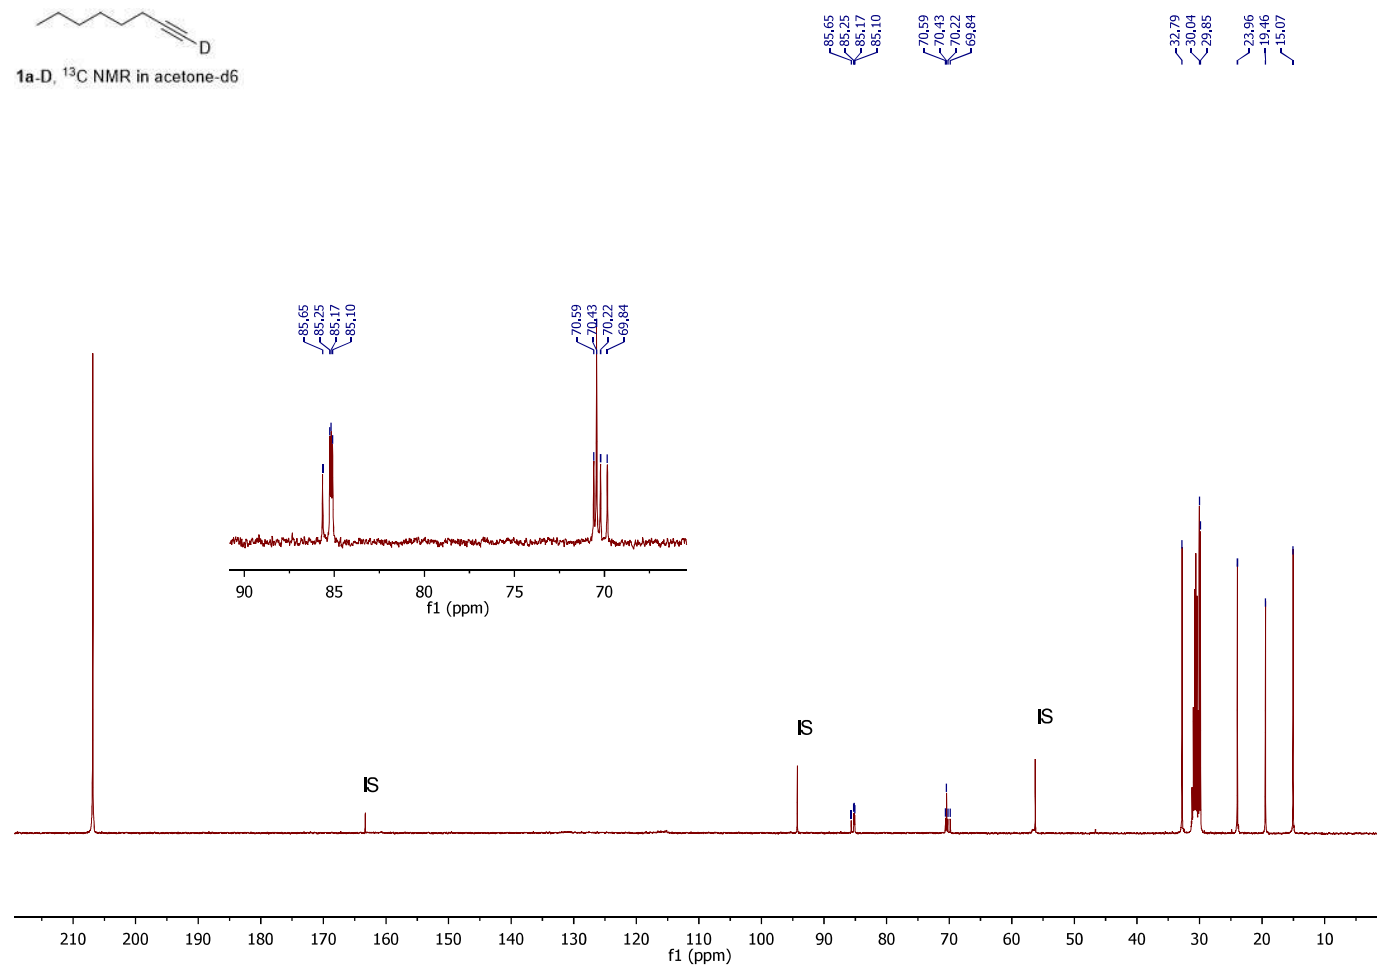

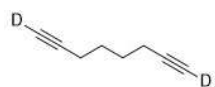

1b-D,  $^1\text{H}$  NMR in acetone- $d_6$

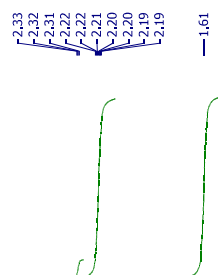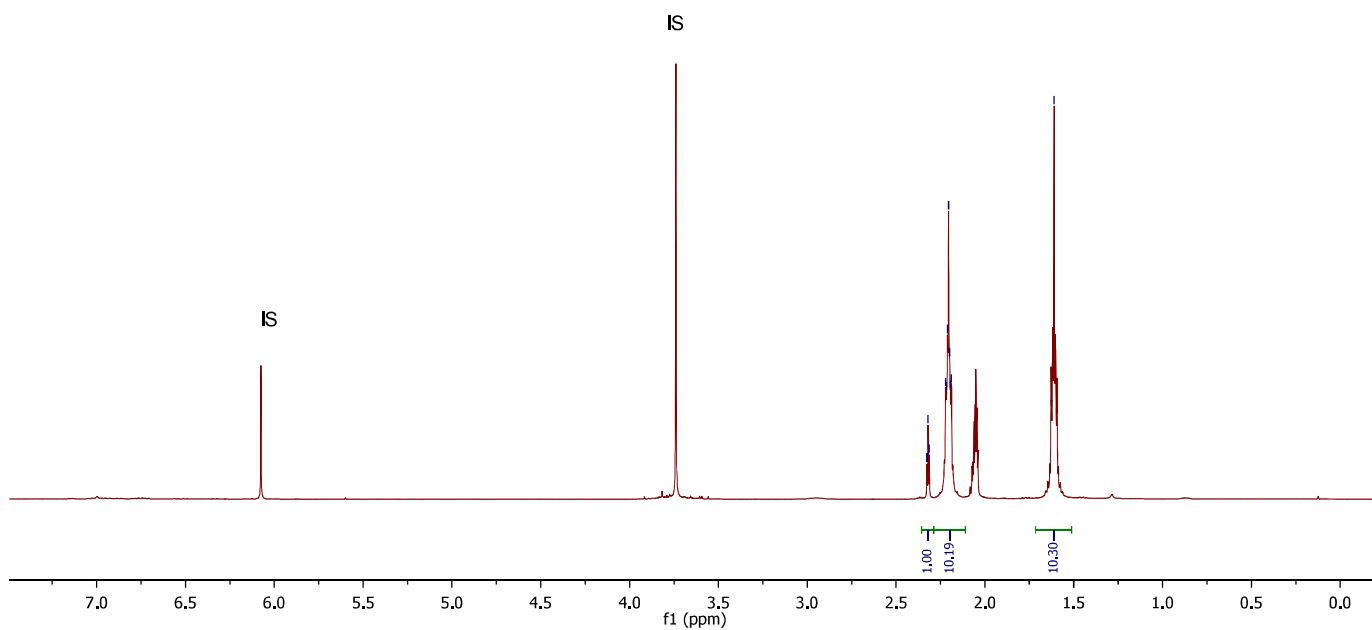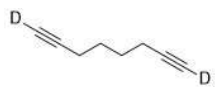

1b-D,  $^{13}\text{C}$  NMR in acetone- $d_6$

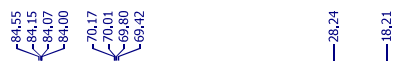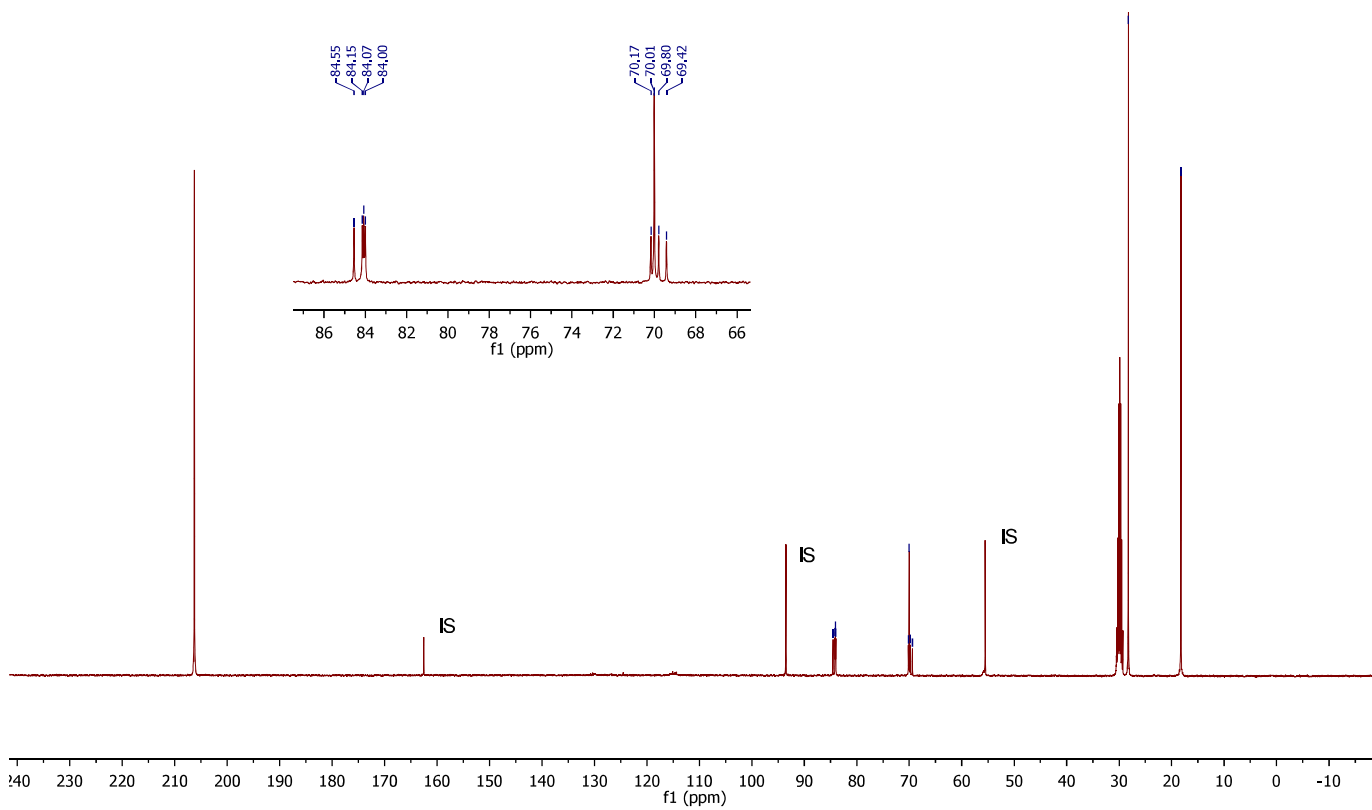

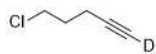

1c-D,  $^1\text{H}$  NMR in acetone- $d_6$

3.74  
3.73  
3.71

2.88

2.40  
2.38  
2.36

2.00  
1.99  
1.97  
1.95  
1.94

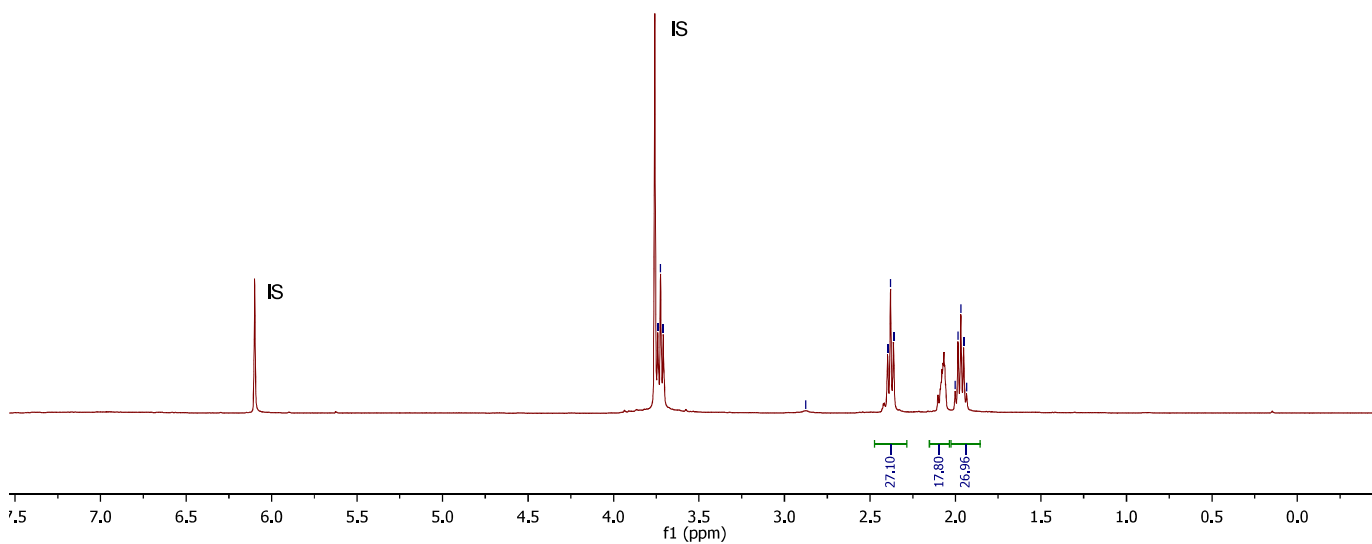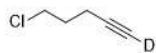

1c-D,  $^{13}\text{C}$  NMR in acetone- $d_6$

83.26  
82.86  
82.78  
82.71

70.86  
70.70  
70.49  
70.11

44.31

32.09

16.12

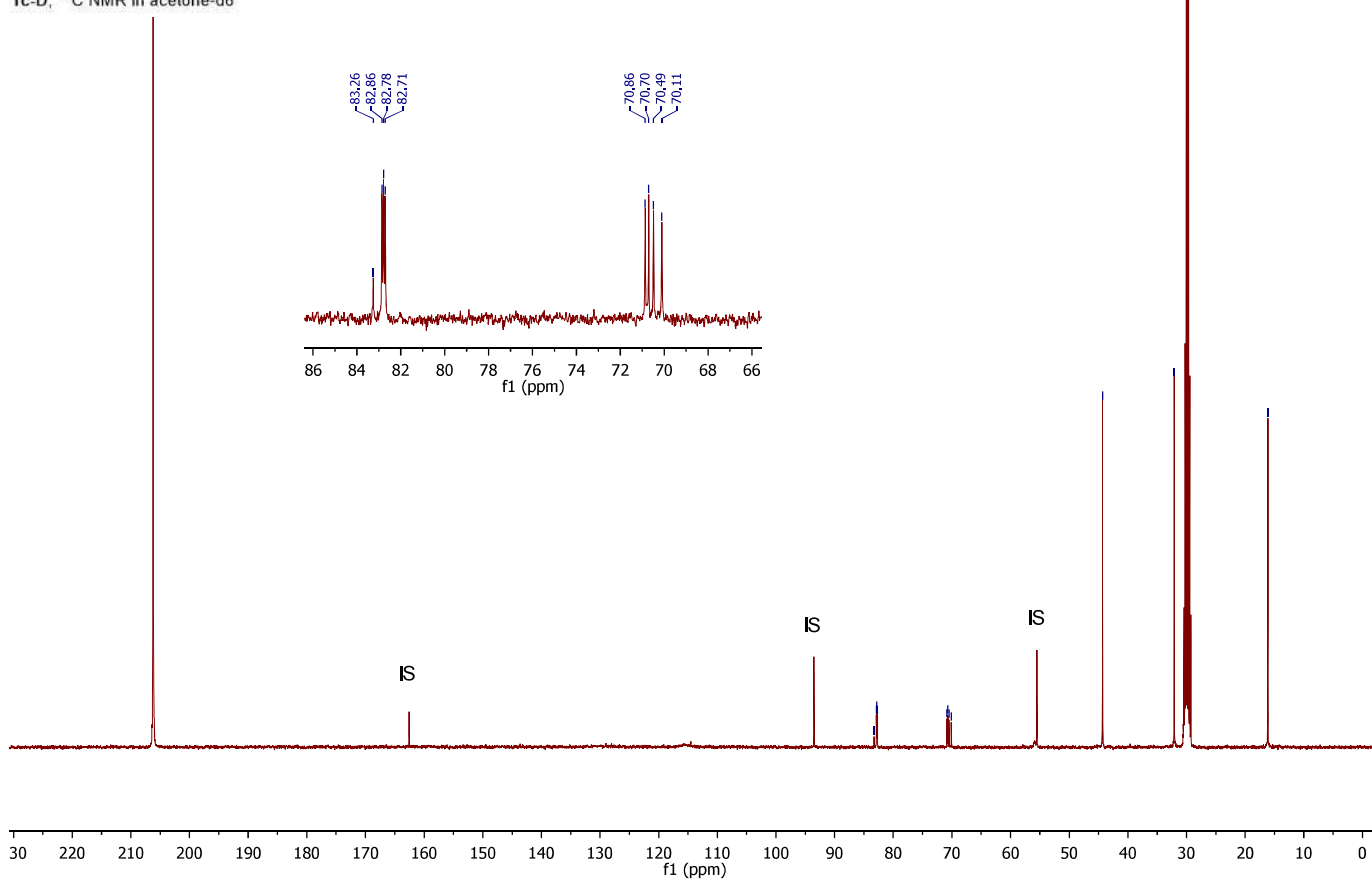

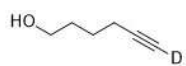

1d-D,  $^1\text{H}$  NMR in acetone- $d_6$

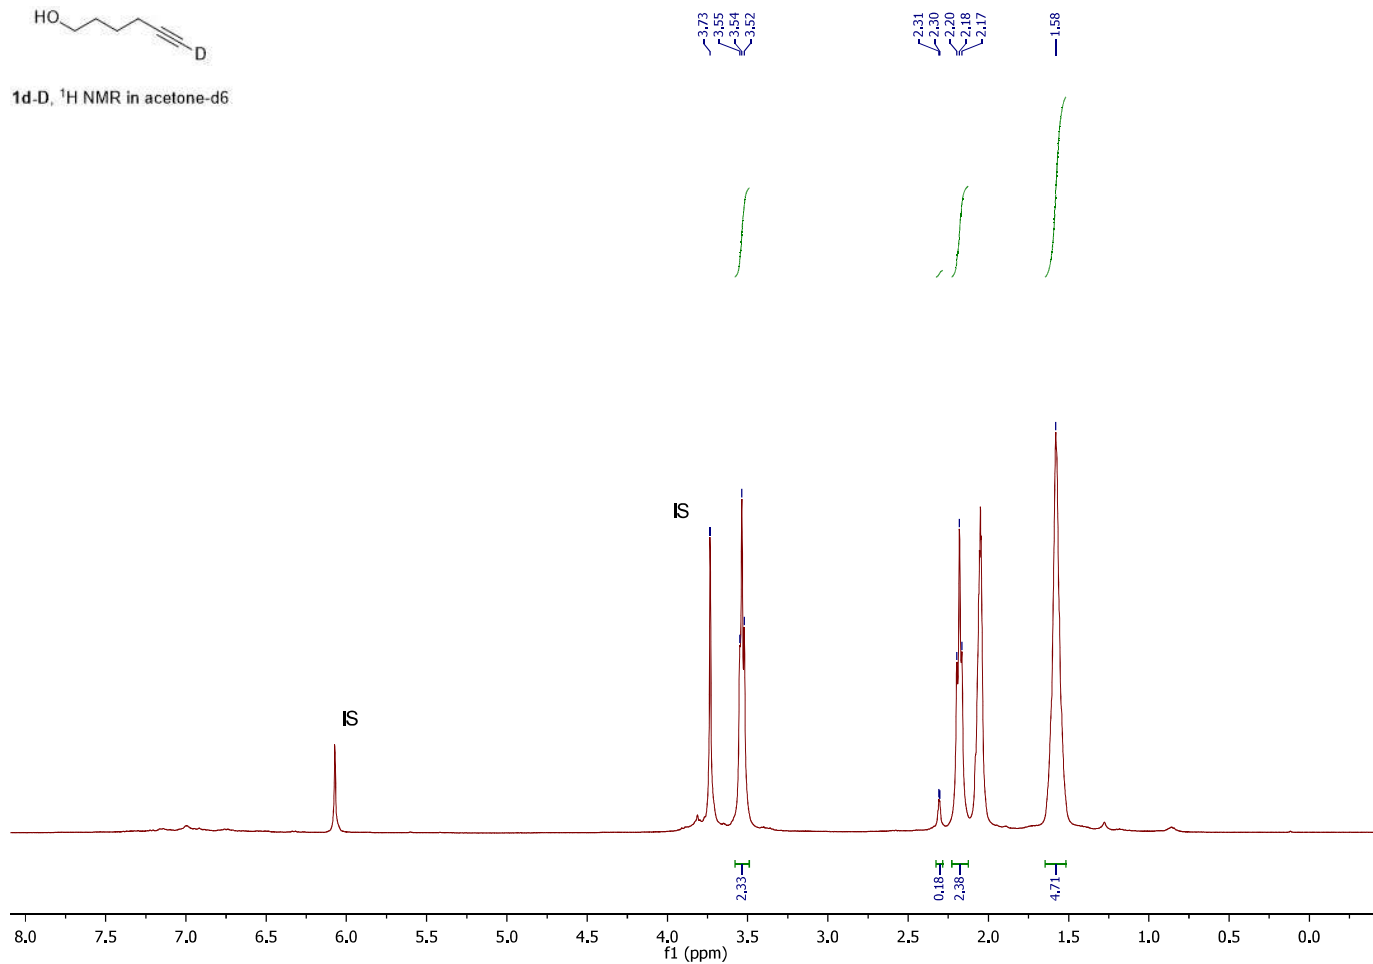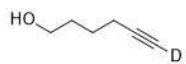

1d-D,  $^{13}\text{C}$  NMR in acetone- $d_6$

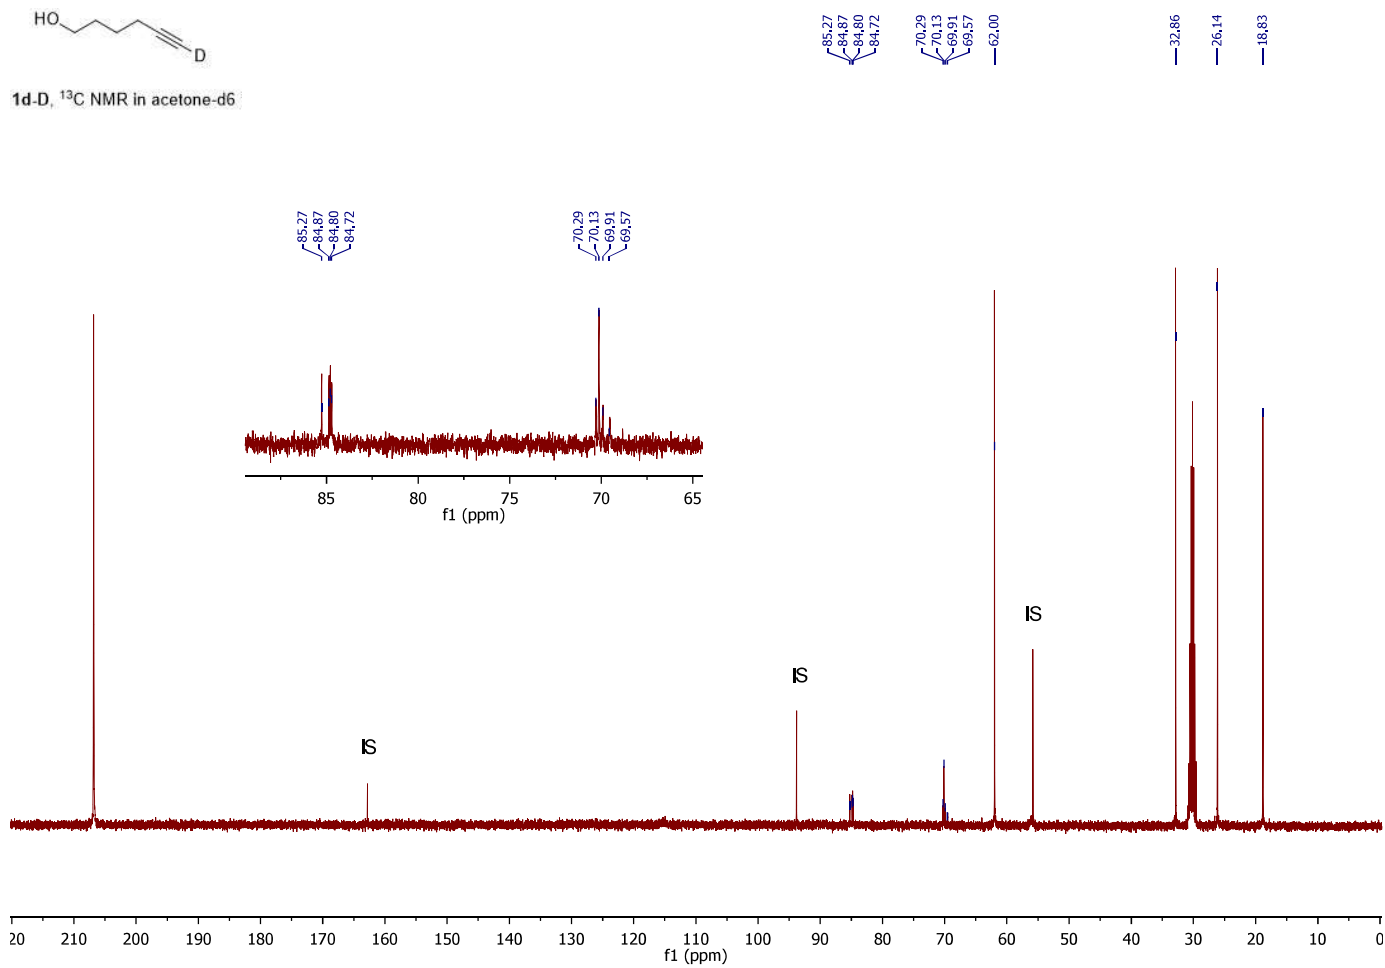

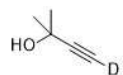

1e-D,  $^1\text{H}$  NMR in acetone- $d_6$

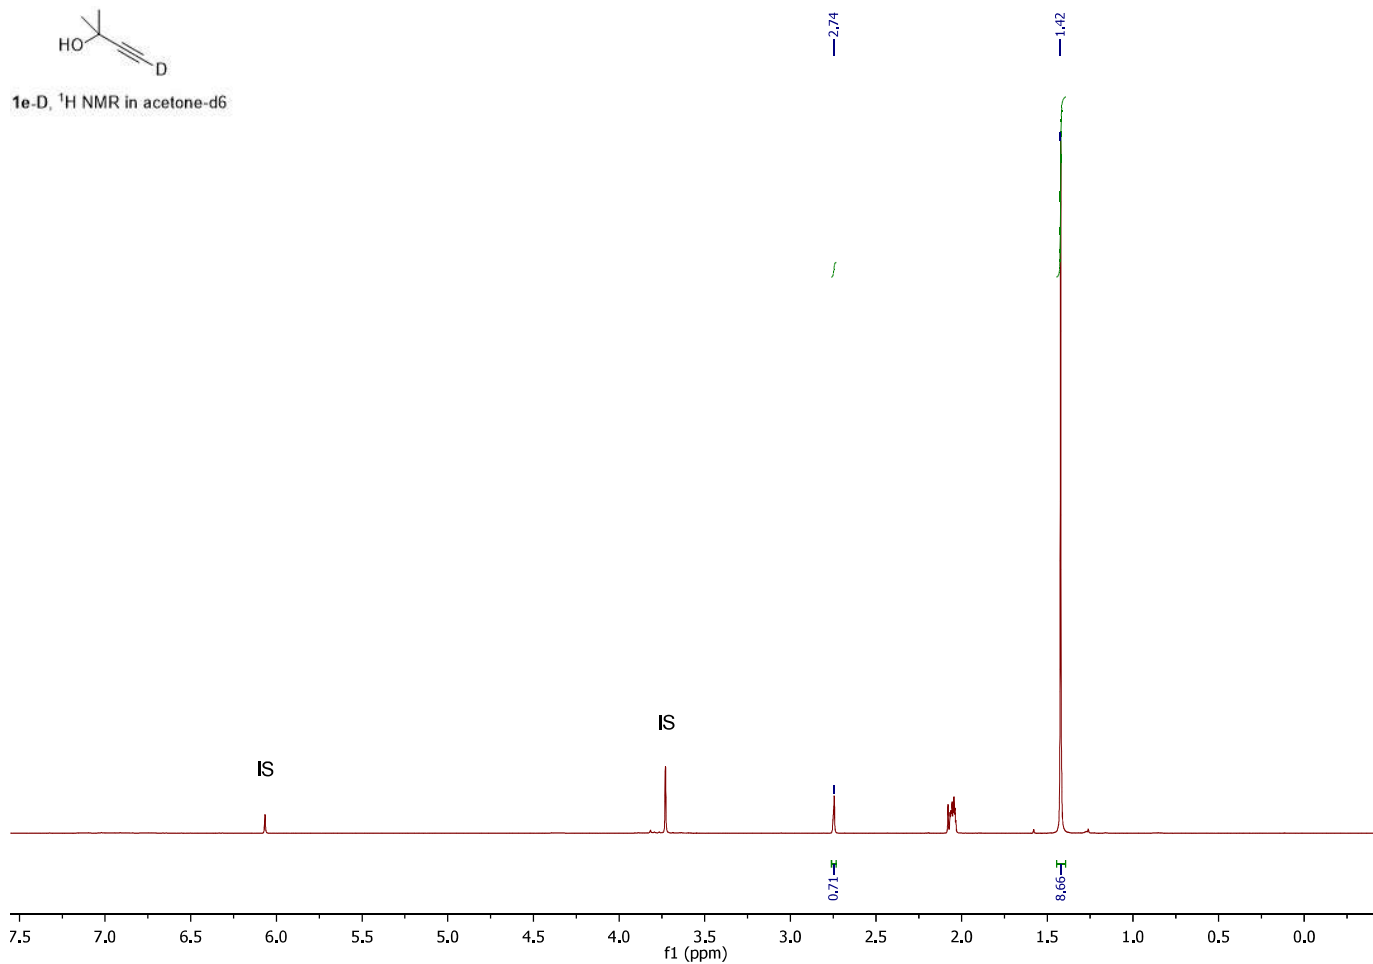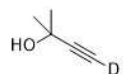

1e-D,  $^{13}\text{C}$  NMR in acetone- $d_6$

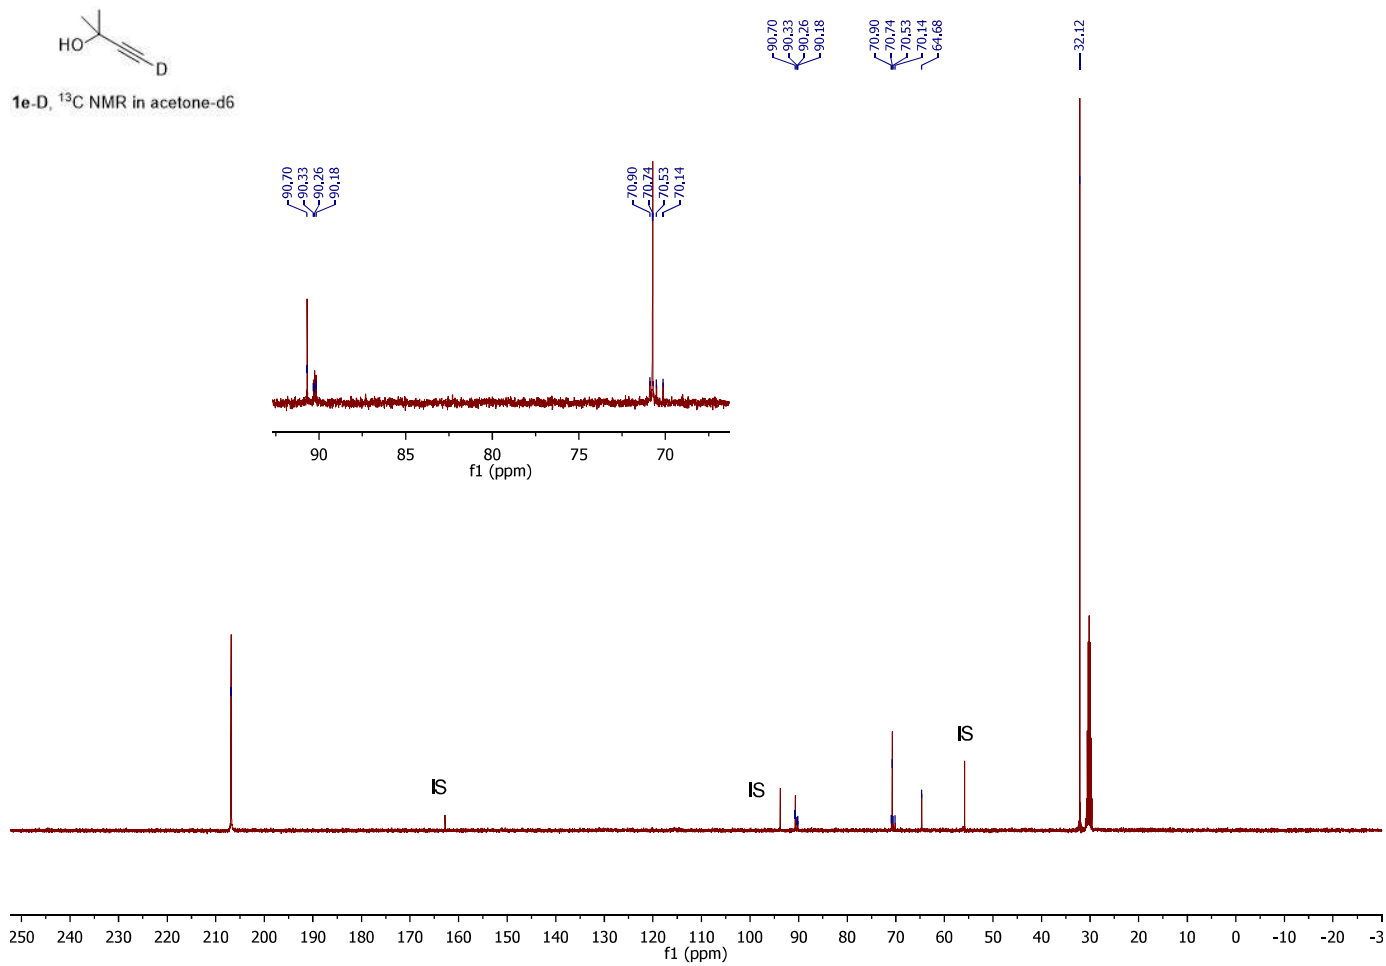

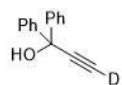

1f-D,  $^1\text{H}$  NMR in acetone- $d_6$

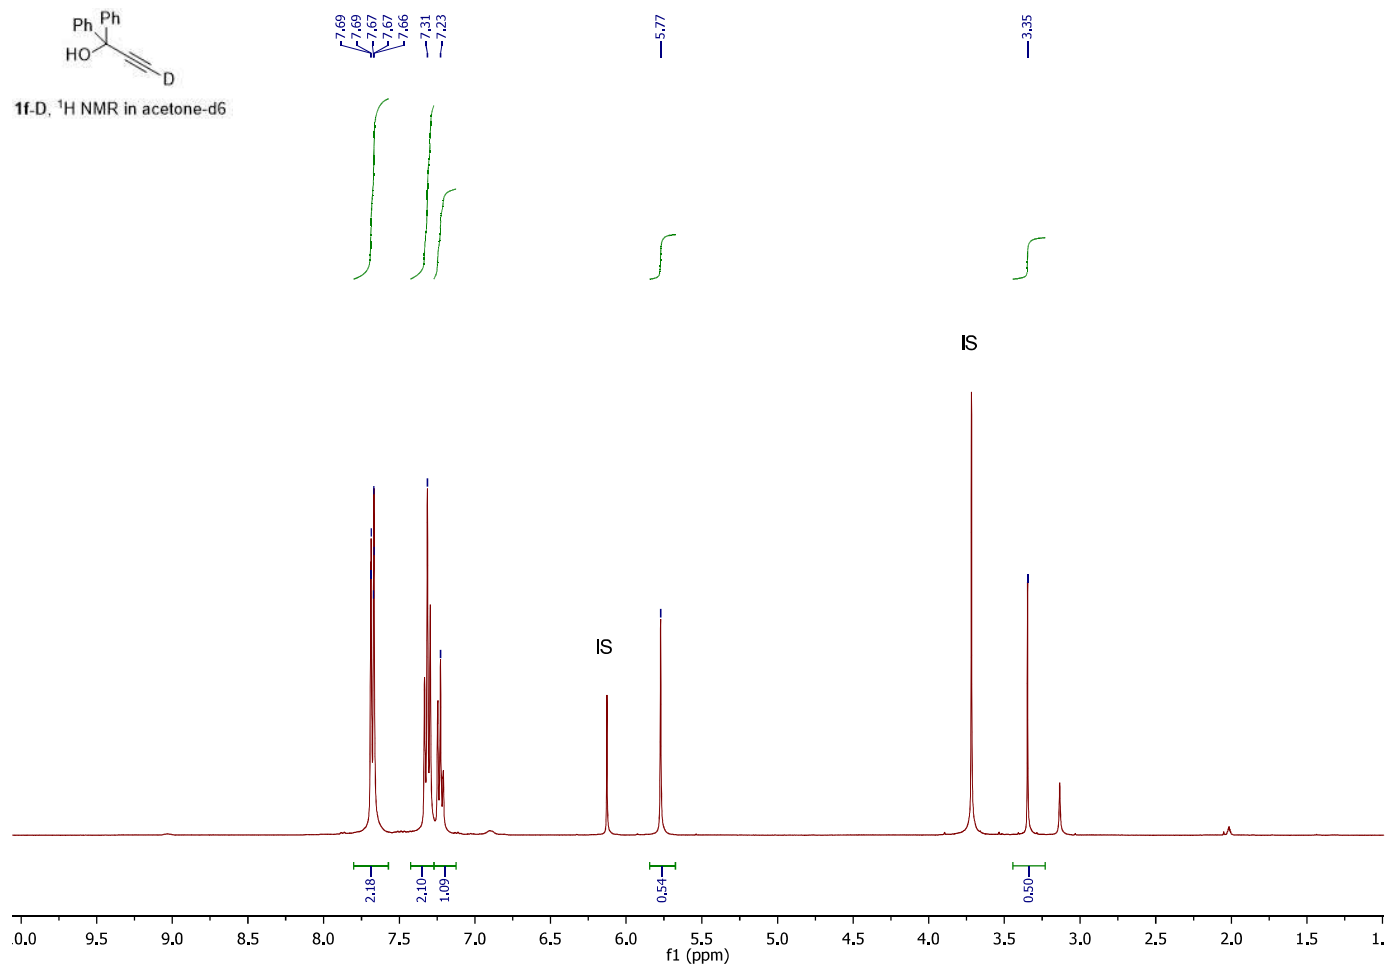

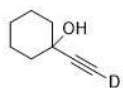

**1g-D**,  $^1\text{H}$  NMR in acetone- $d_6$

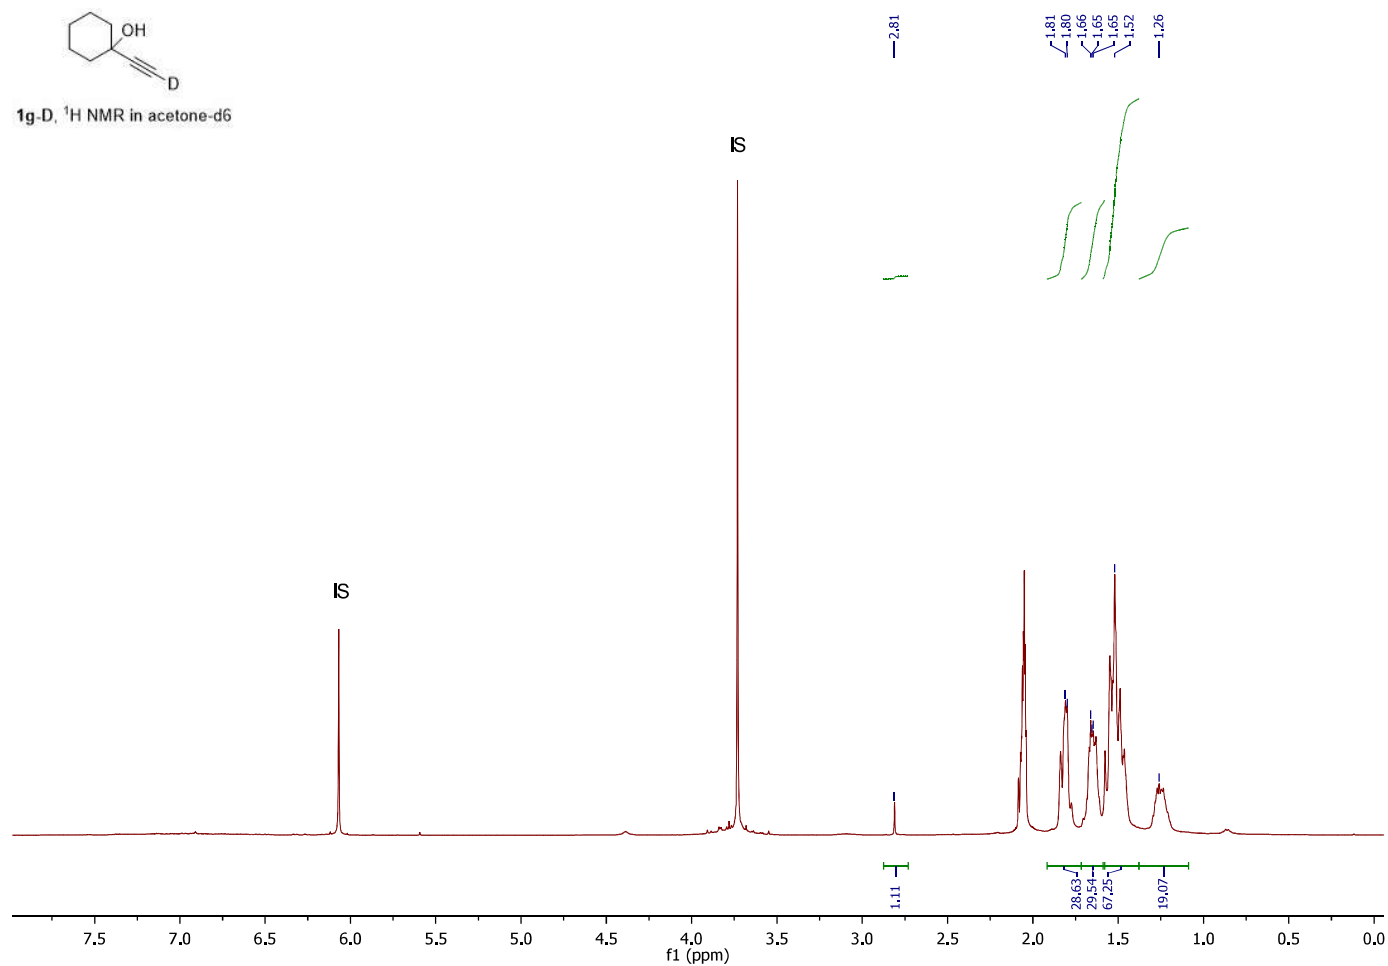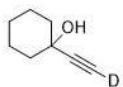

**1g-D**,  $^{13}\text{C}$  NMR in acetone- $d_6$

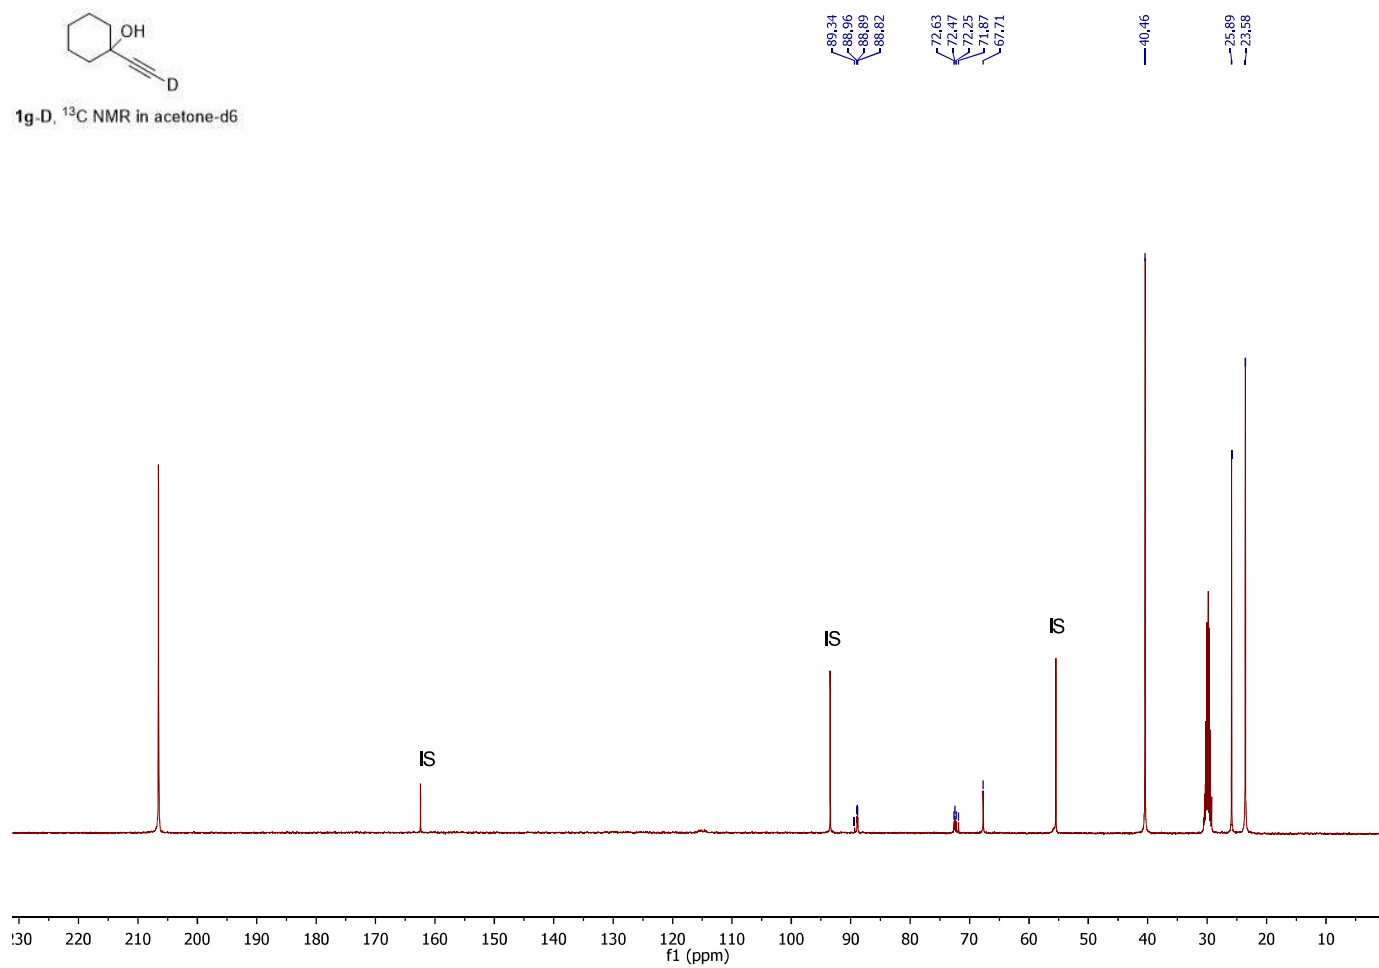



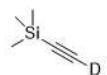

1h-D,  $^1\text{H}$  NMR in acetone- $d_6$

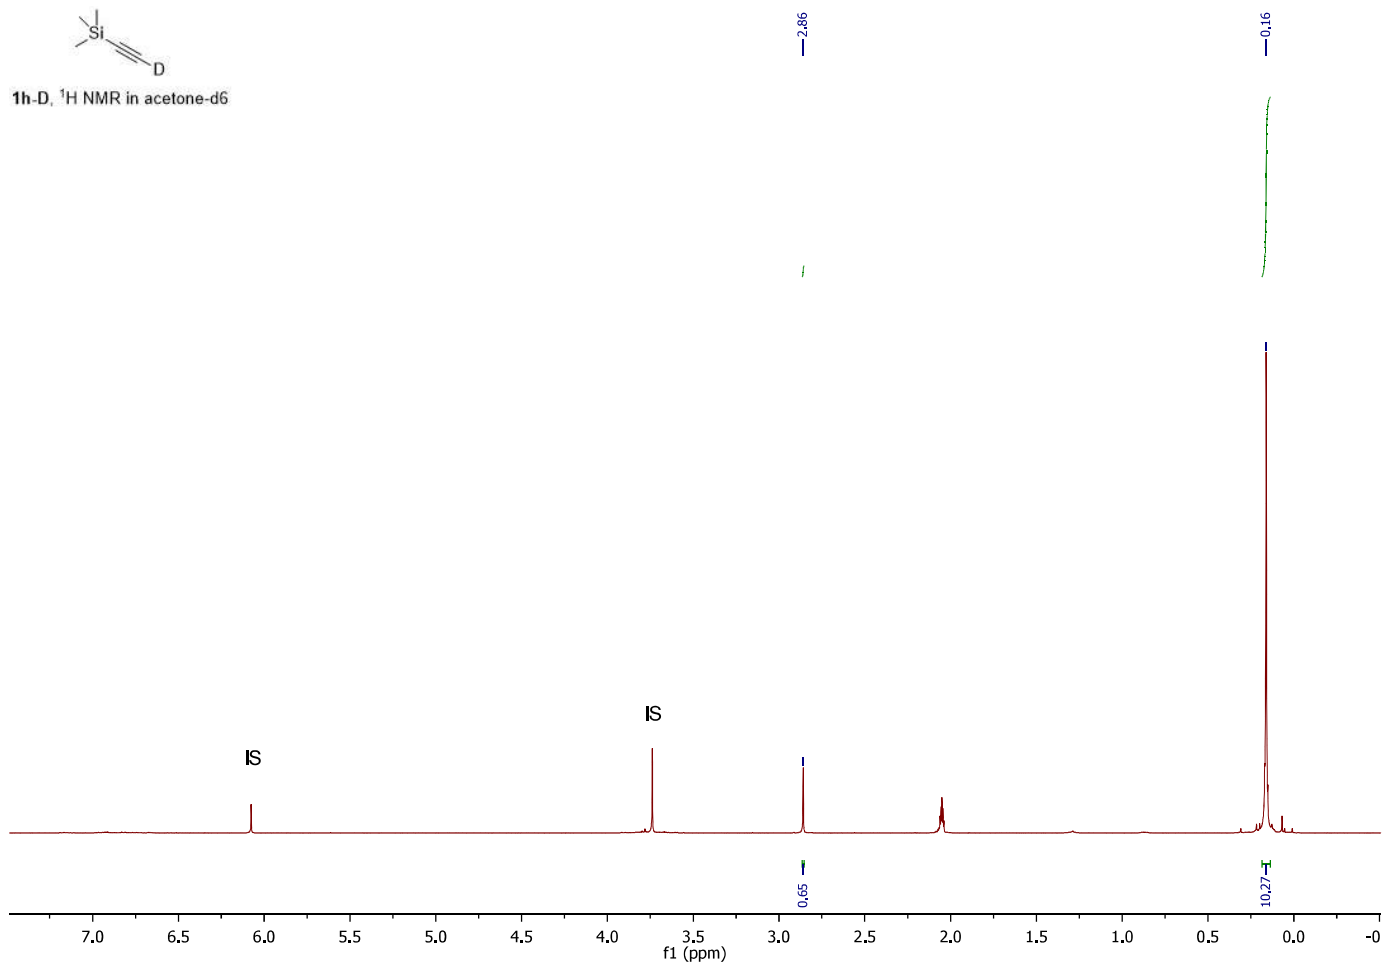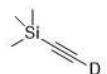

1h-D,  $^{13}\text{C}$  NMR in acetone- $d_6$

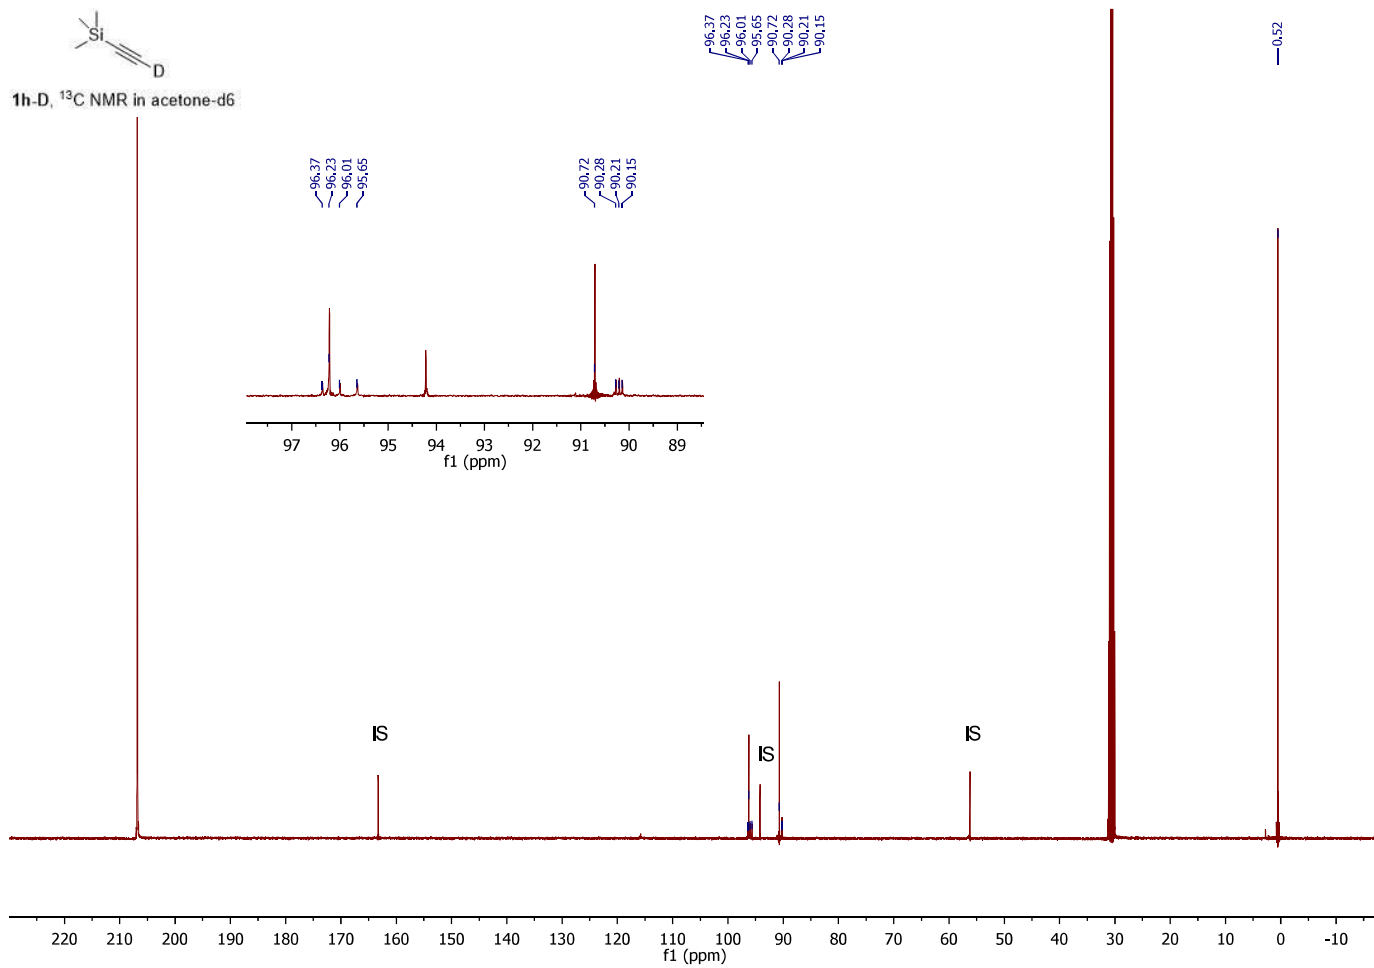

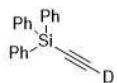

1i-D, <sup>1</sup>H NMR in acetone-d<sub>6</sub>

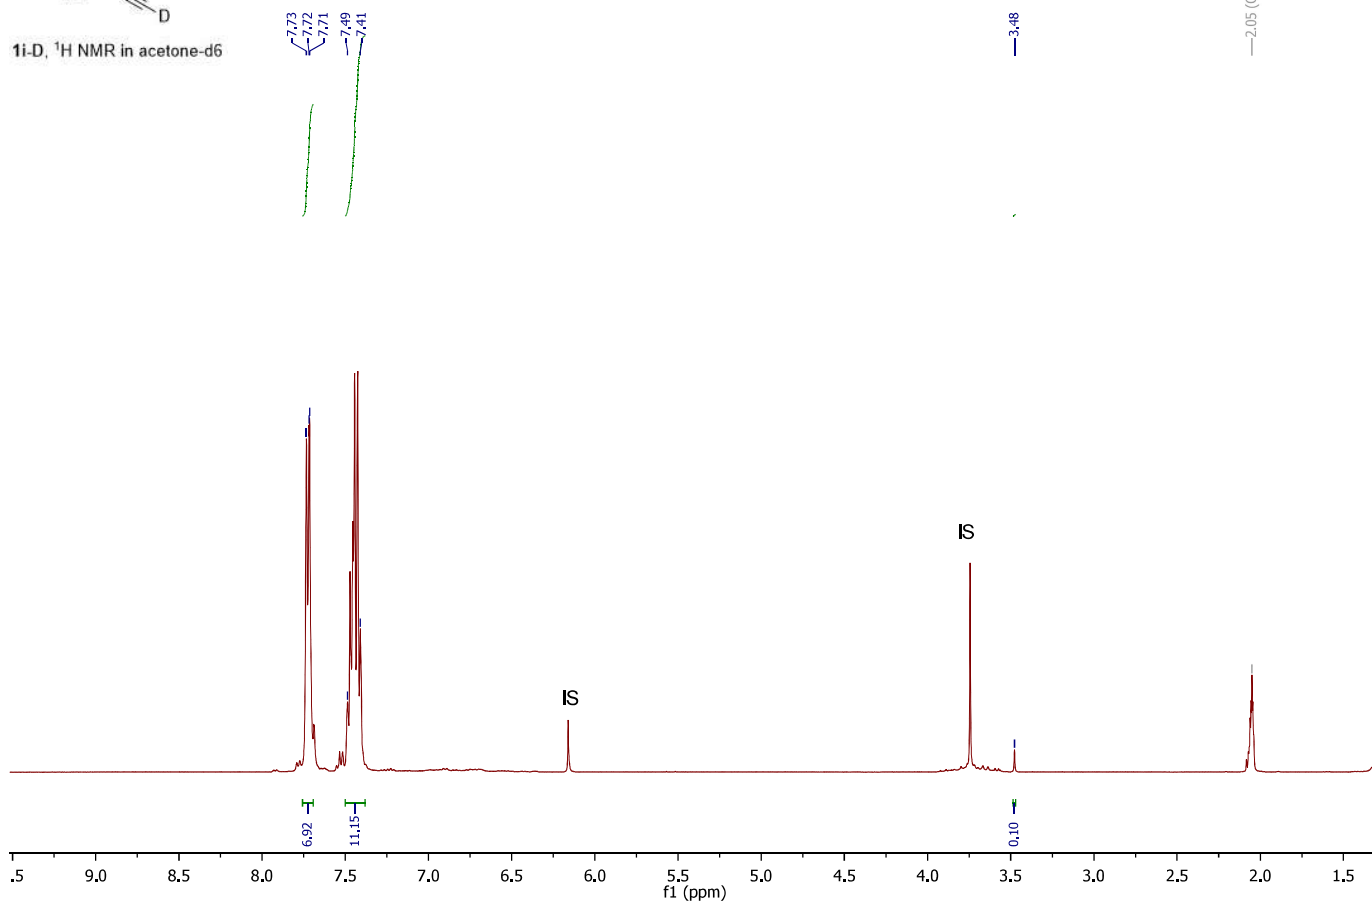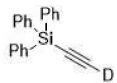

1i-D, <sup>13</sup>C NMR in acetone-d<sub>6</sub>

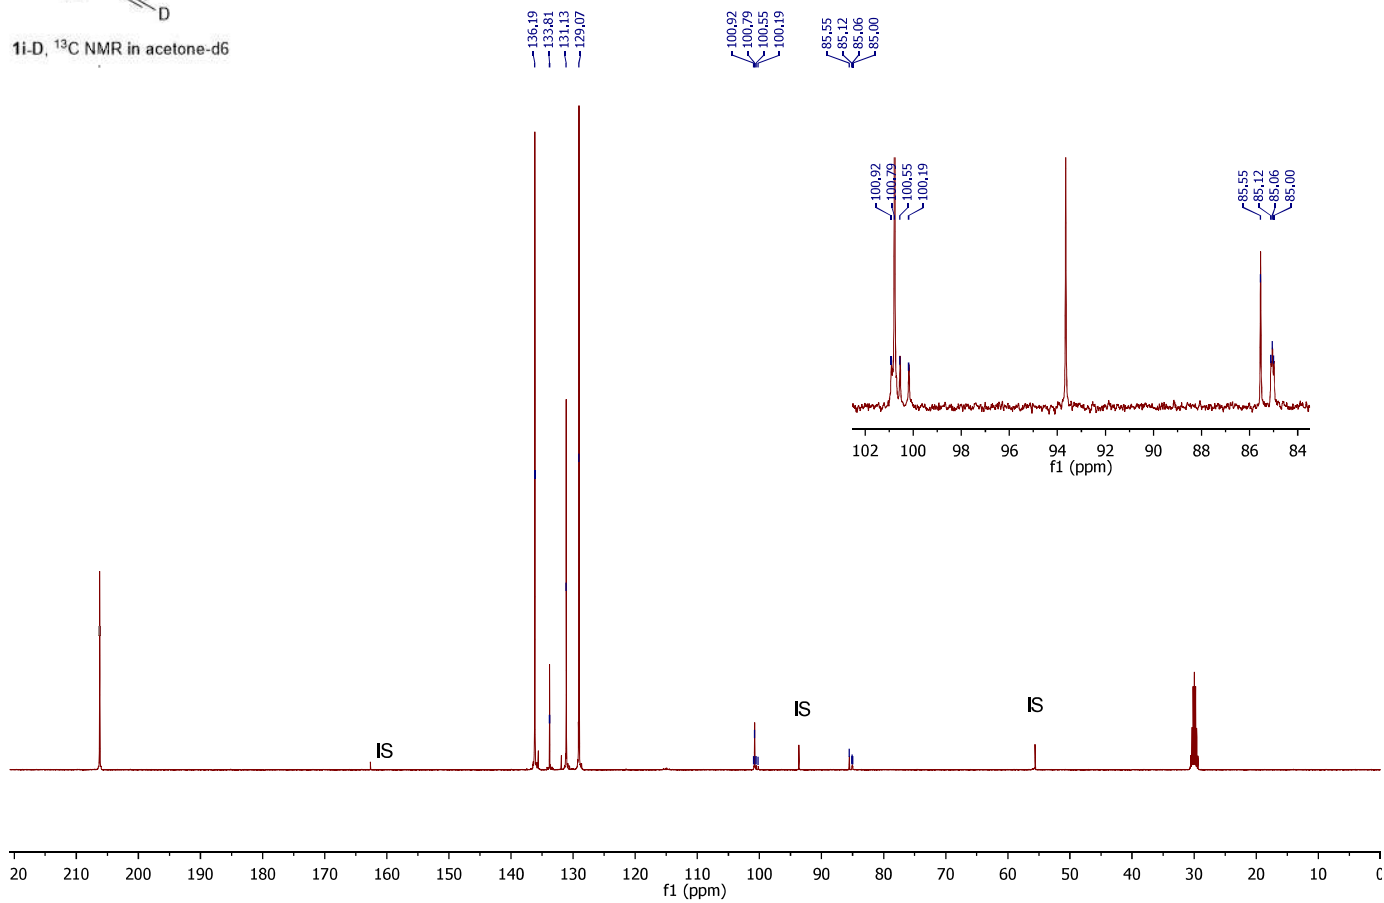

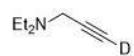

1j-D,  $^1\text{H}$  NMR in acetone- $d_6$

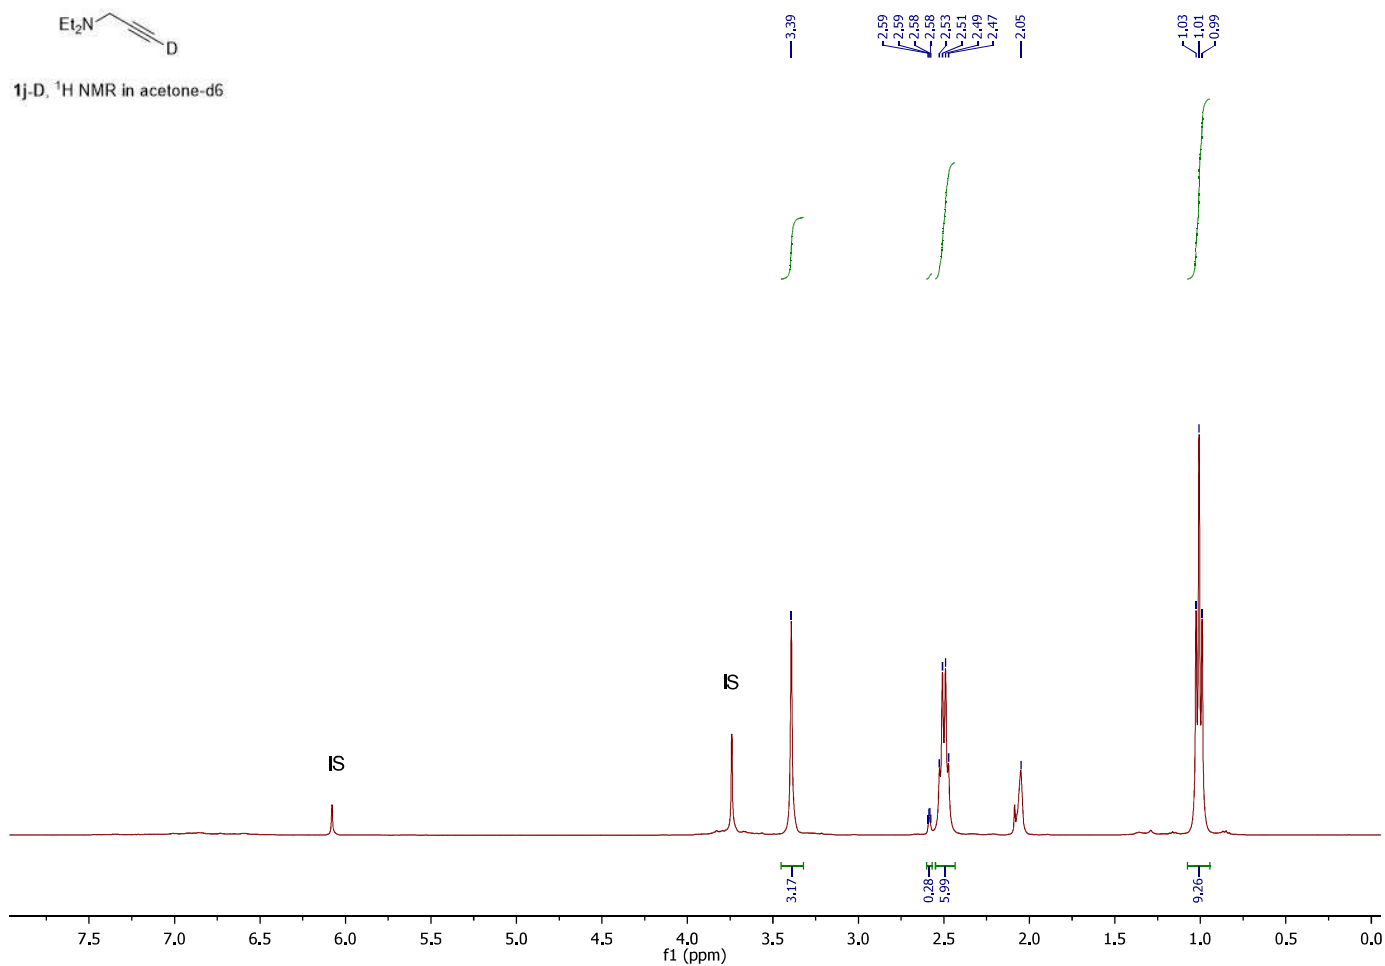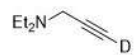

1j-D,  $^{13}\text{C}$  NMR in acetone- $d_6$

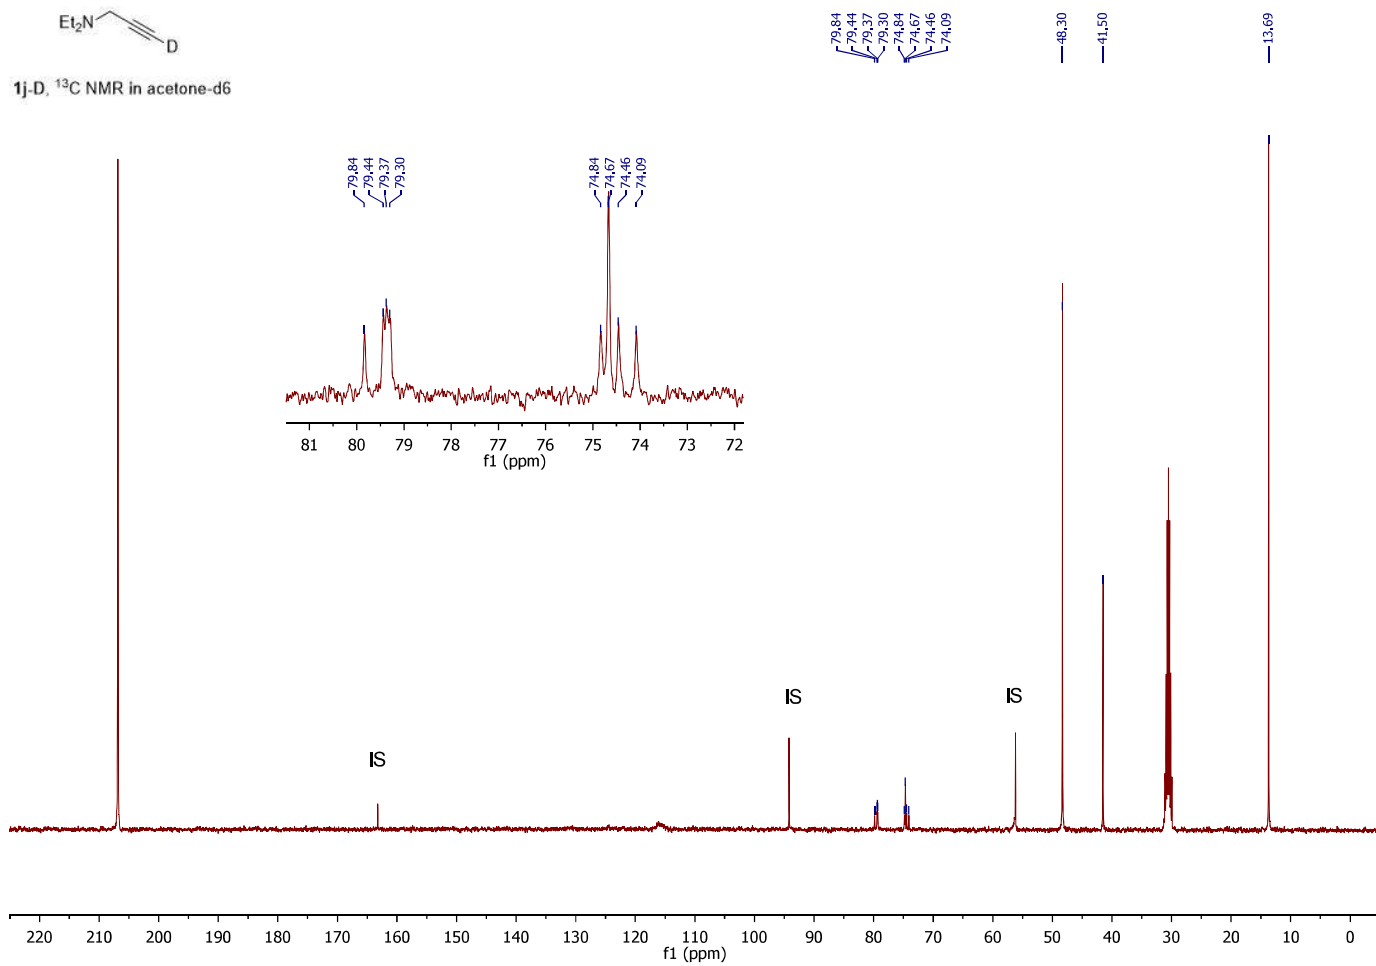

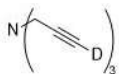

1k-D,  $^1\text{H}$  NMR in acetone-d<sub>6</sub>

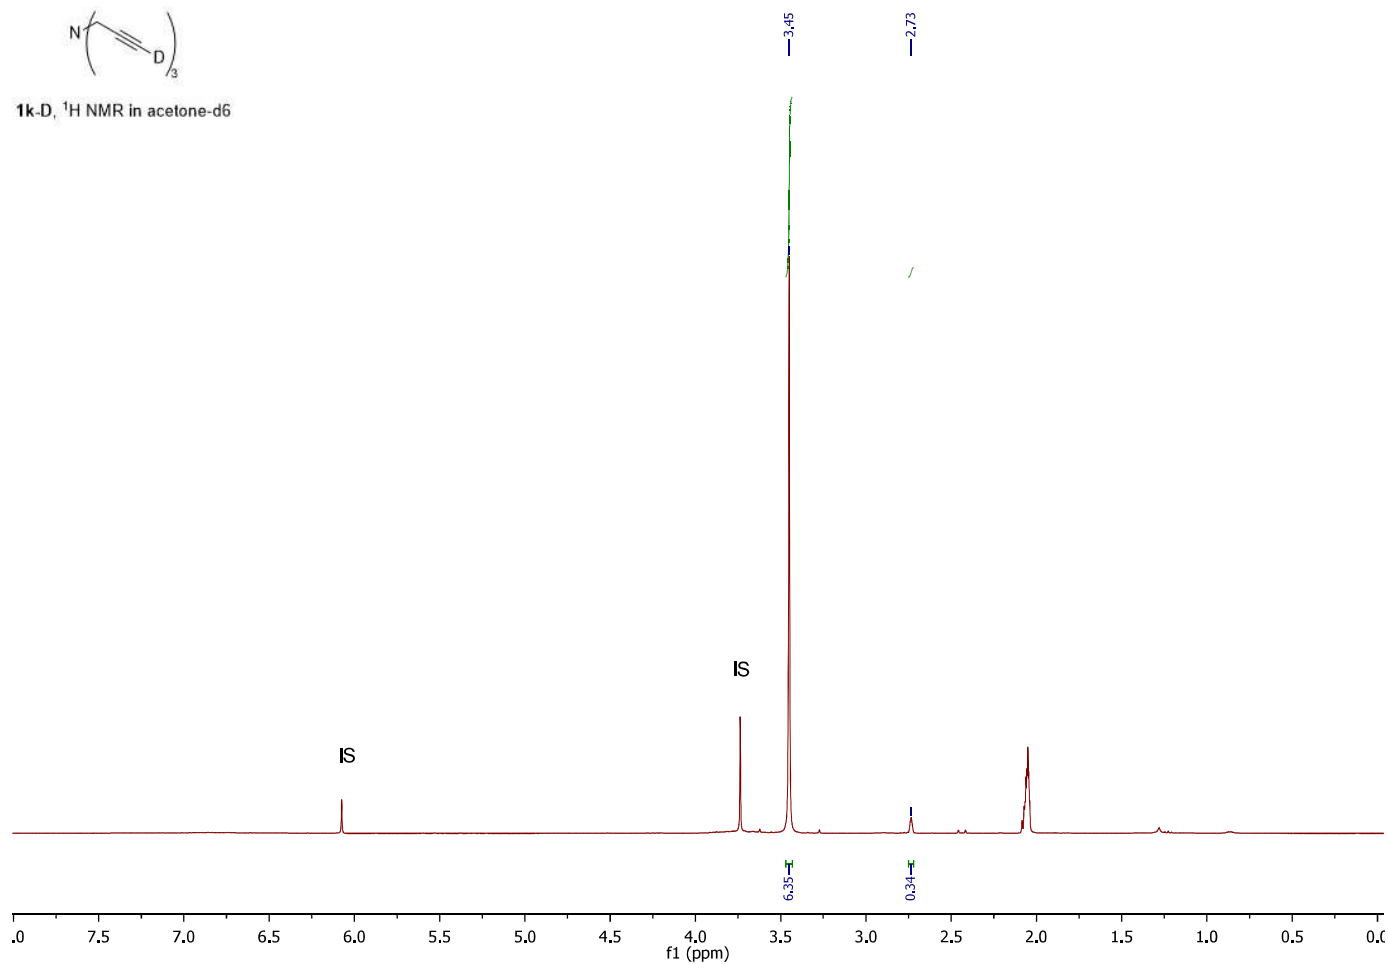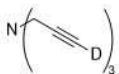

1k-D,  $^{13}\text{C}$  NMR in acetone-d<sub>6</sub>

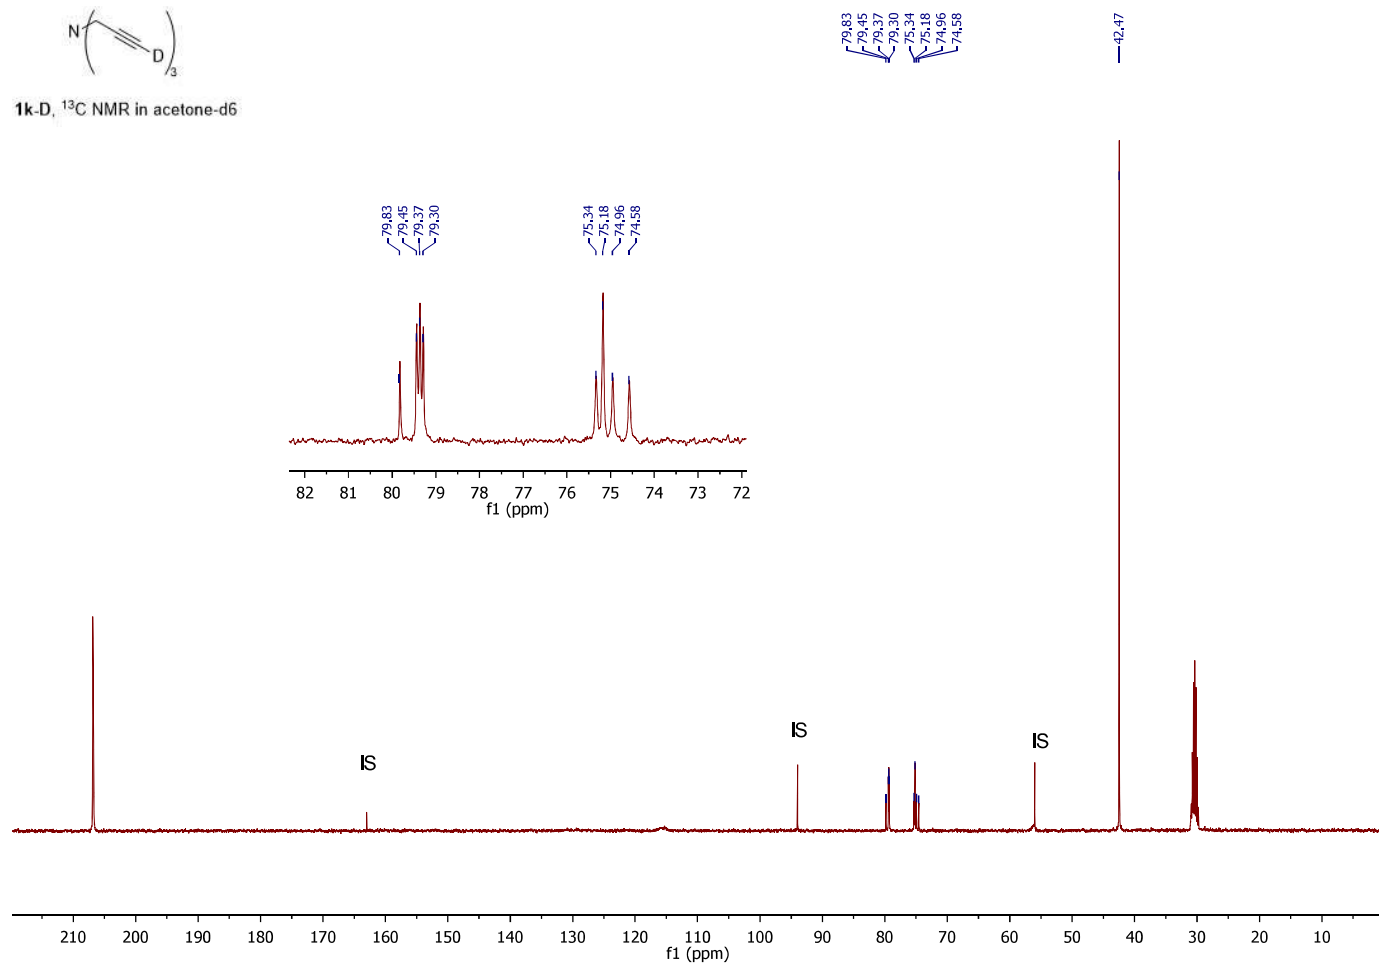

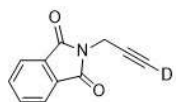

11-D,  $^1\text{H}$  NMR in  $\text{CDCl}_3$

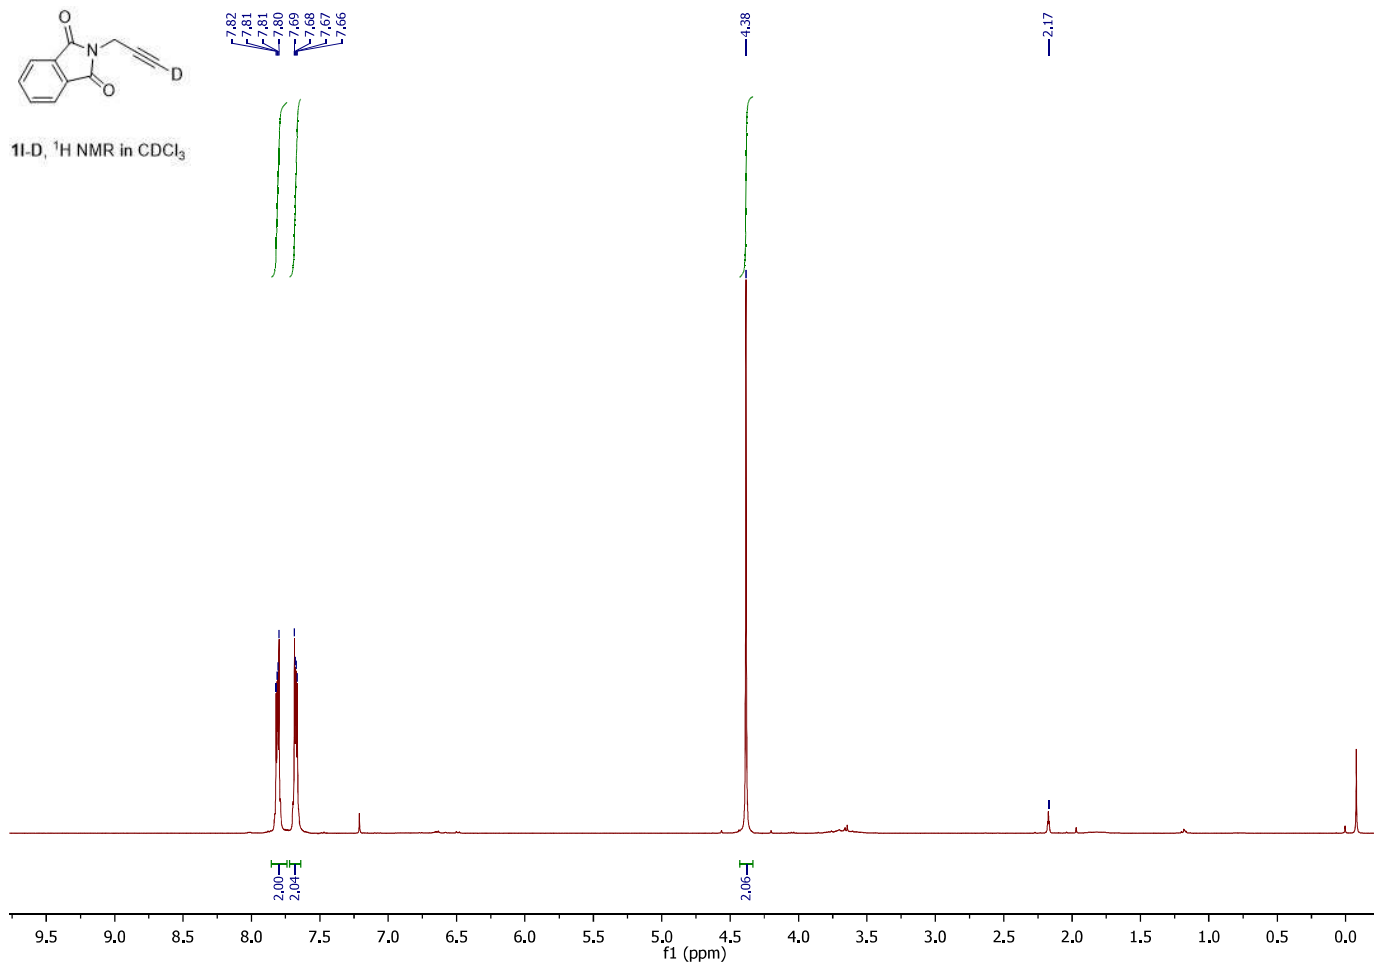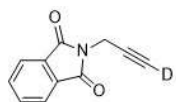

11-D,  $^{13}\text{C}$  NMR in  $\text{CDCl}_3$

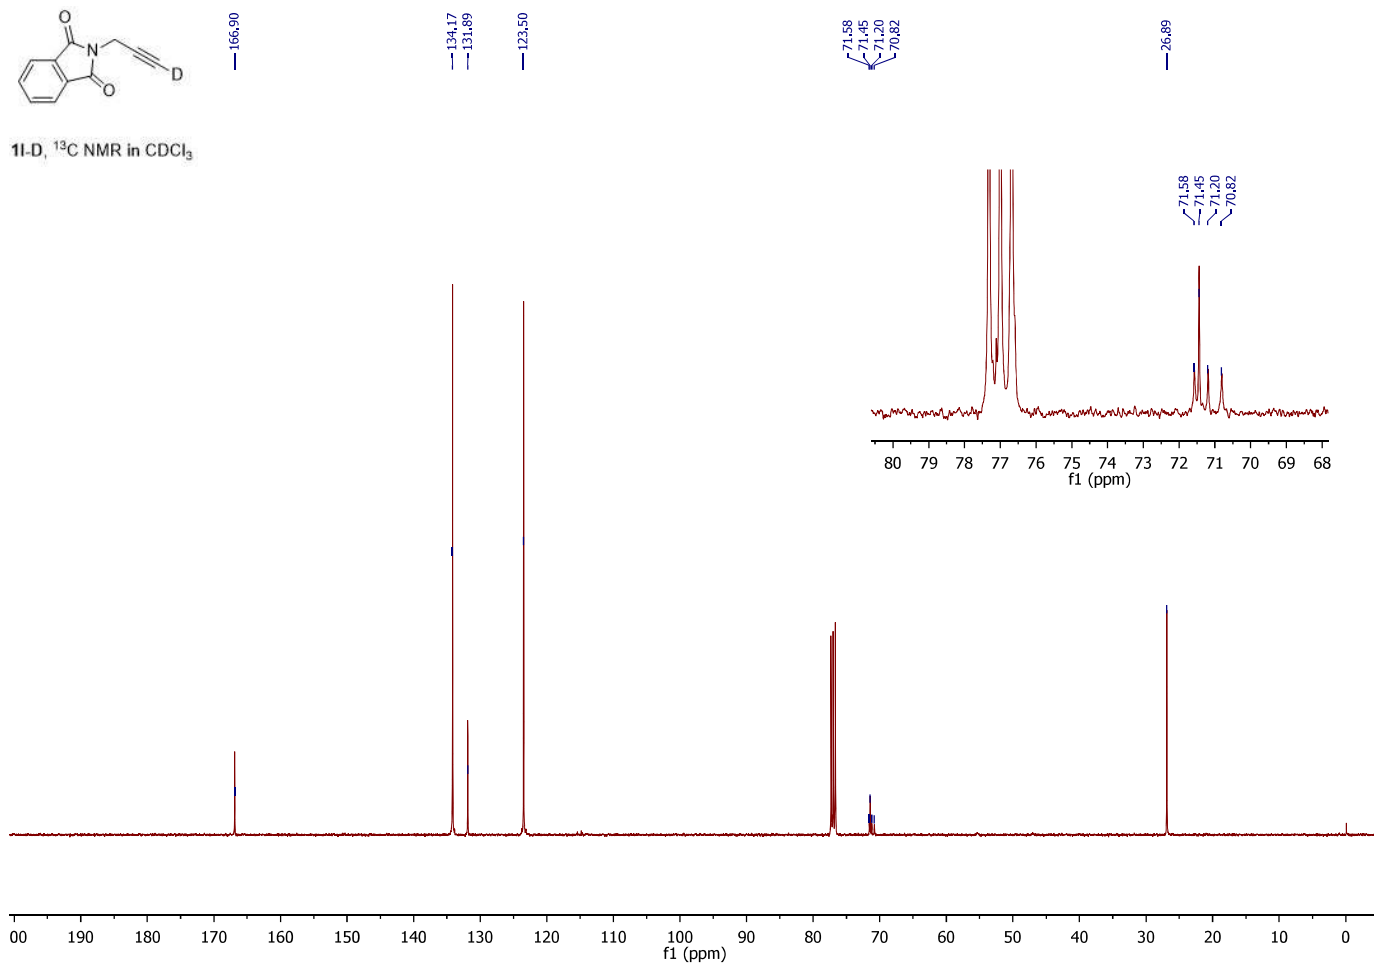

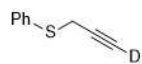

1m-D, <sup>1</sup>H NMR in acetone-d6

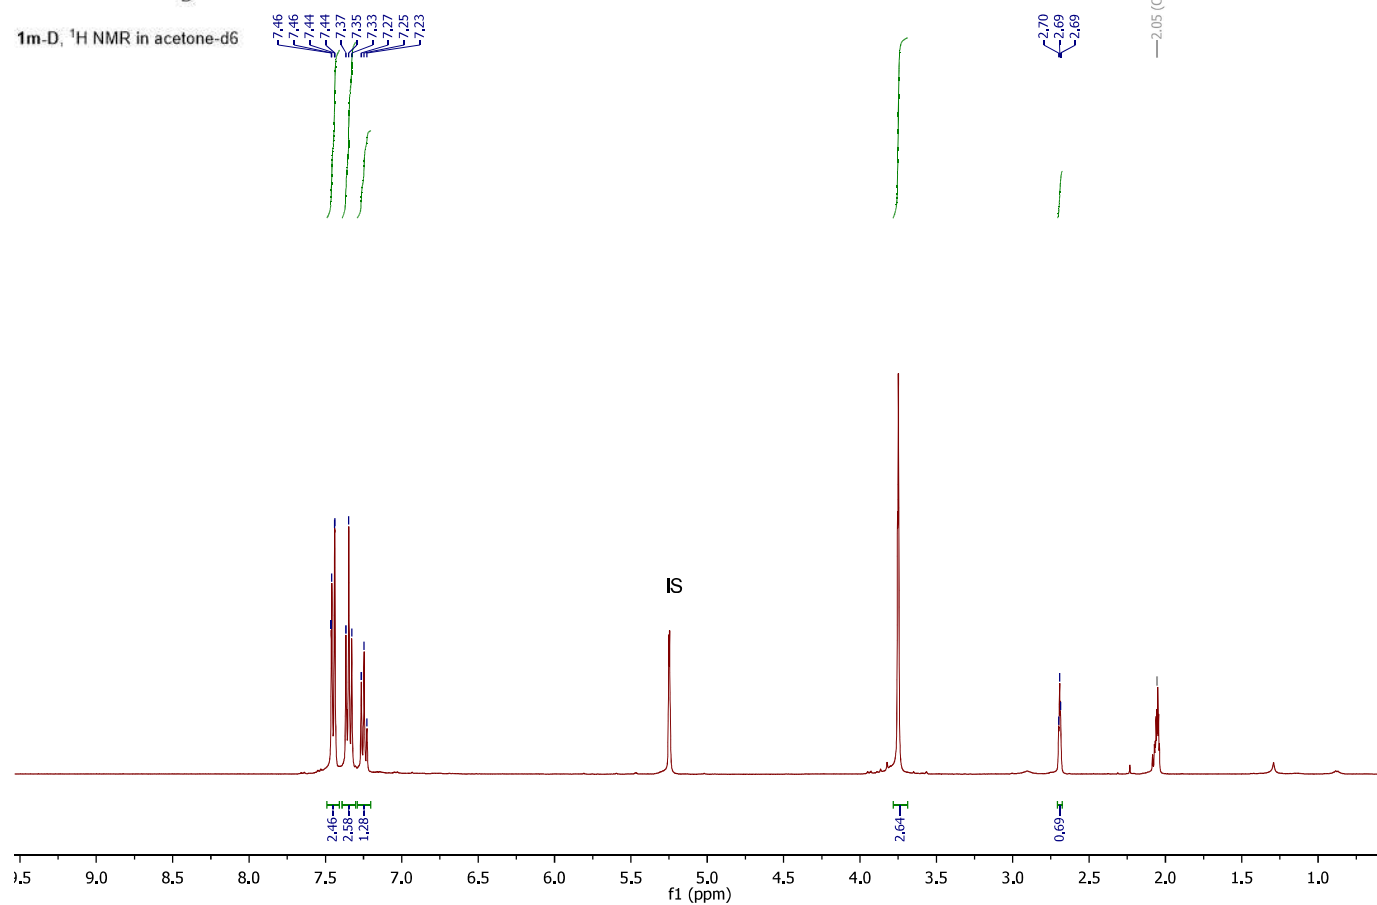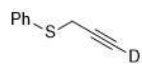

1m-D, <sup>13</sup>C NMR in acetone-d6

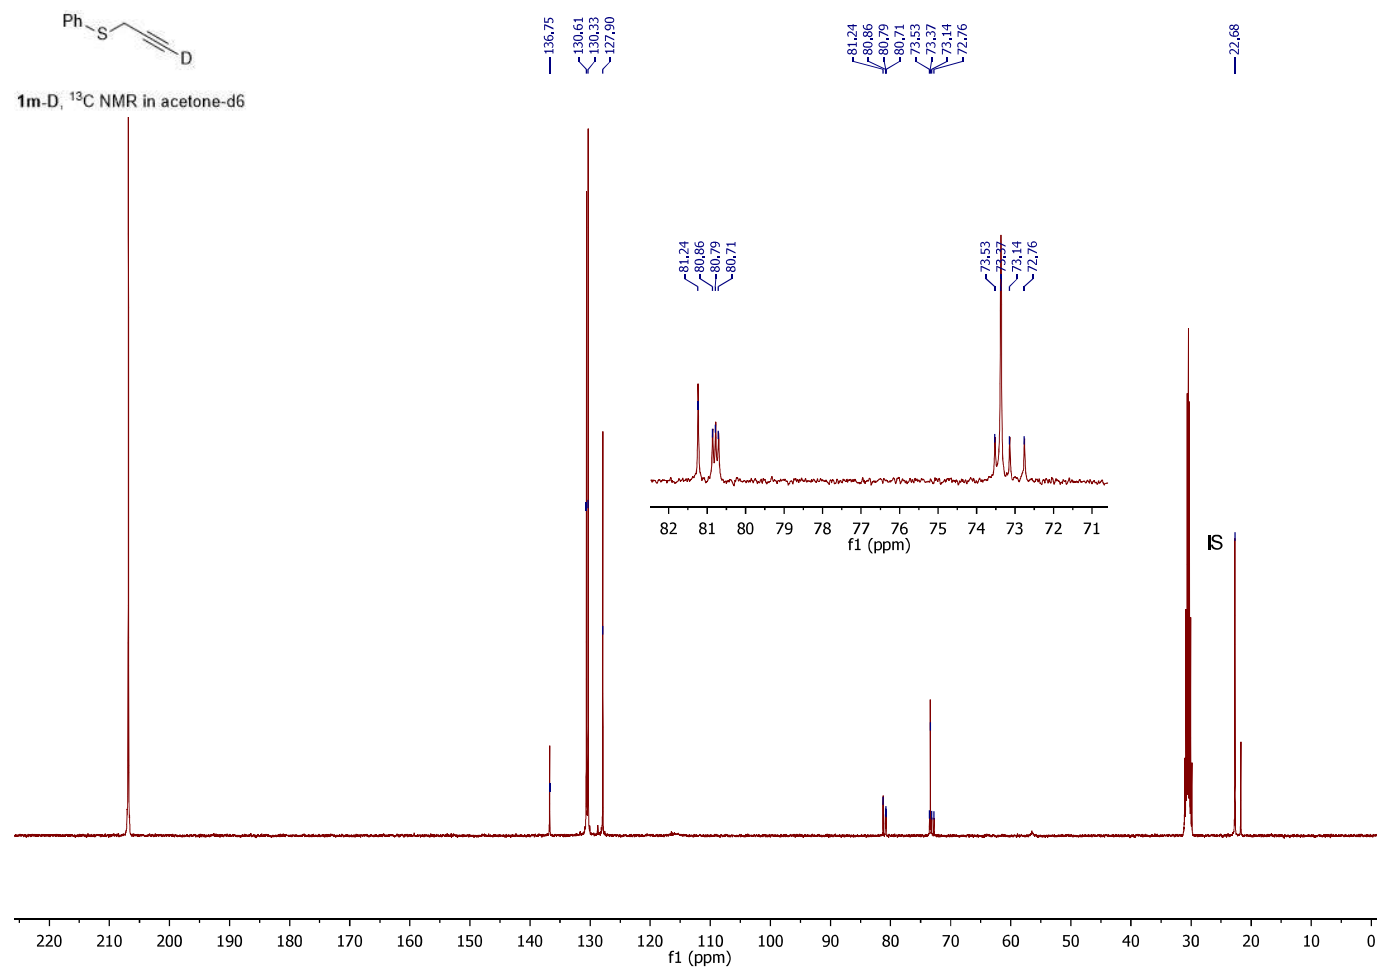

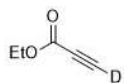

1n-D,  $^1\text{H}$  NMR in acetone- $d_6$

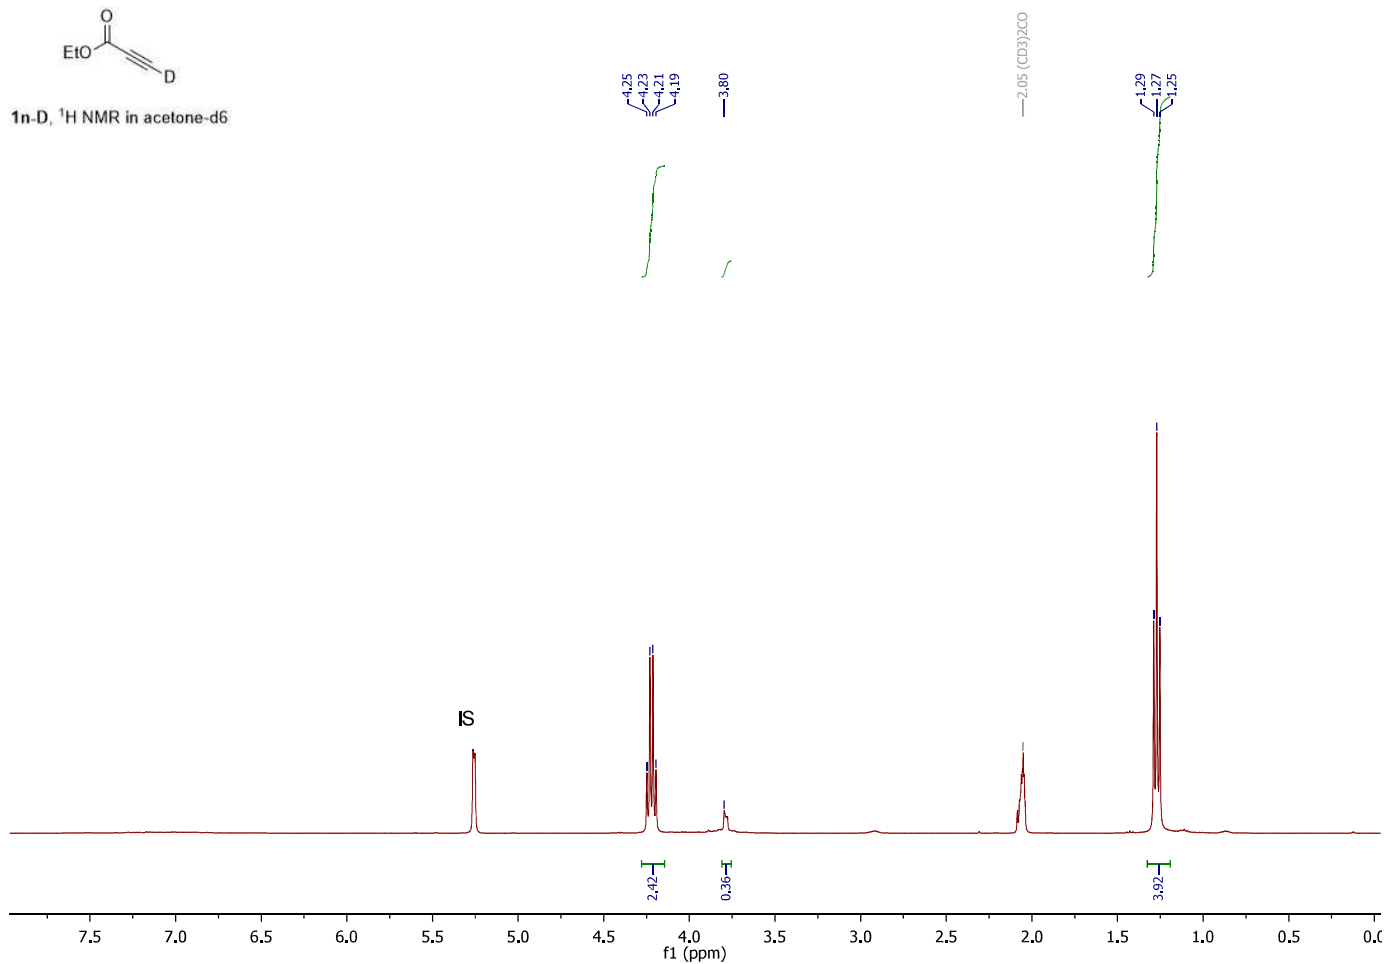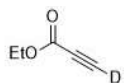

1n-D,  $^{13}\text{C}$  NMR in acetone- $d_6$

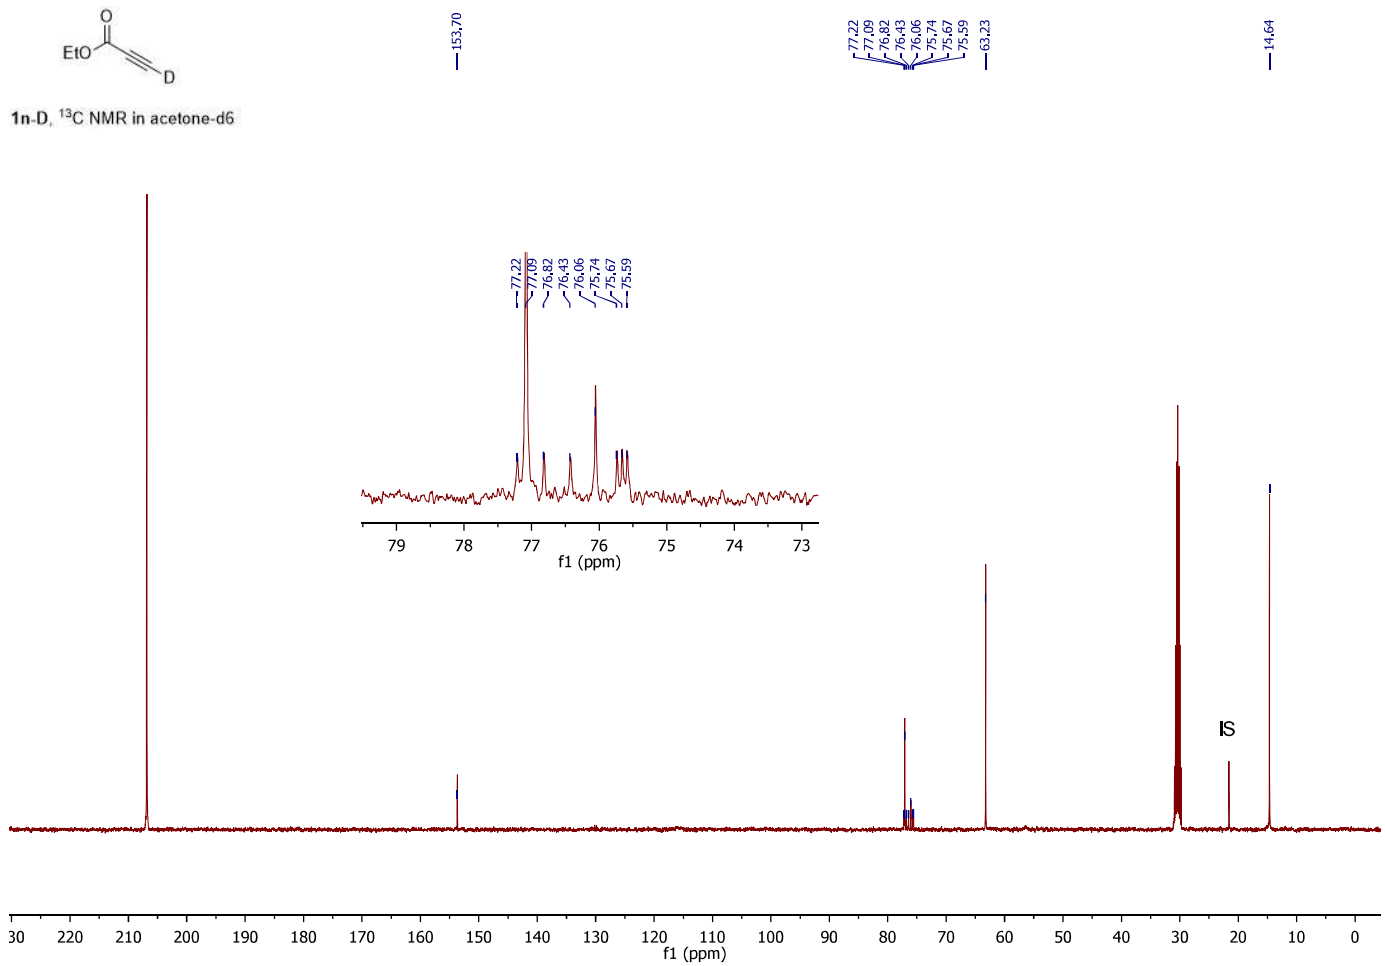

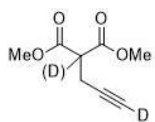

**1o-D**,  $^1\text{H}$  NMR in acetone- $d_6$   
Reaction carried out at 50 °C

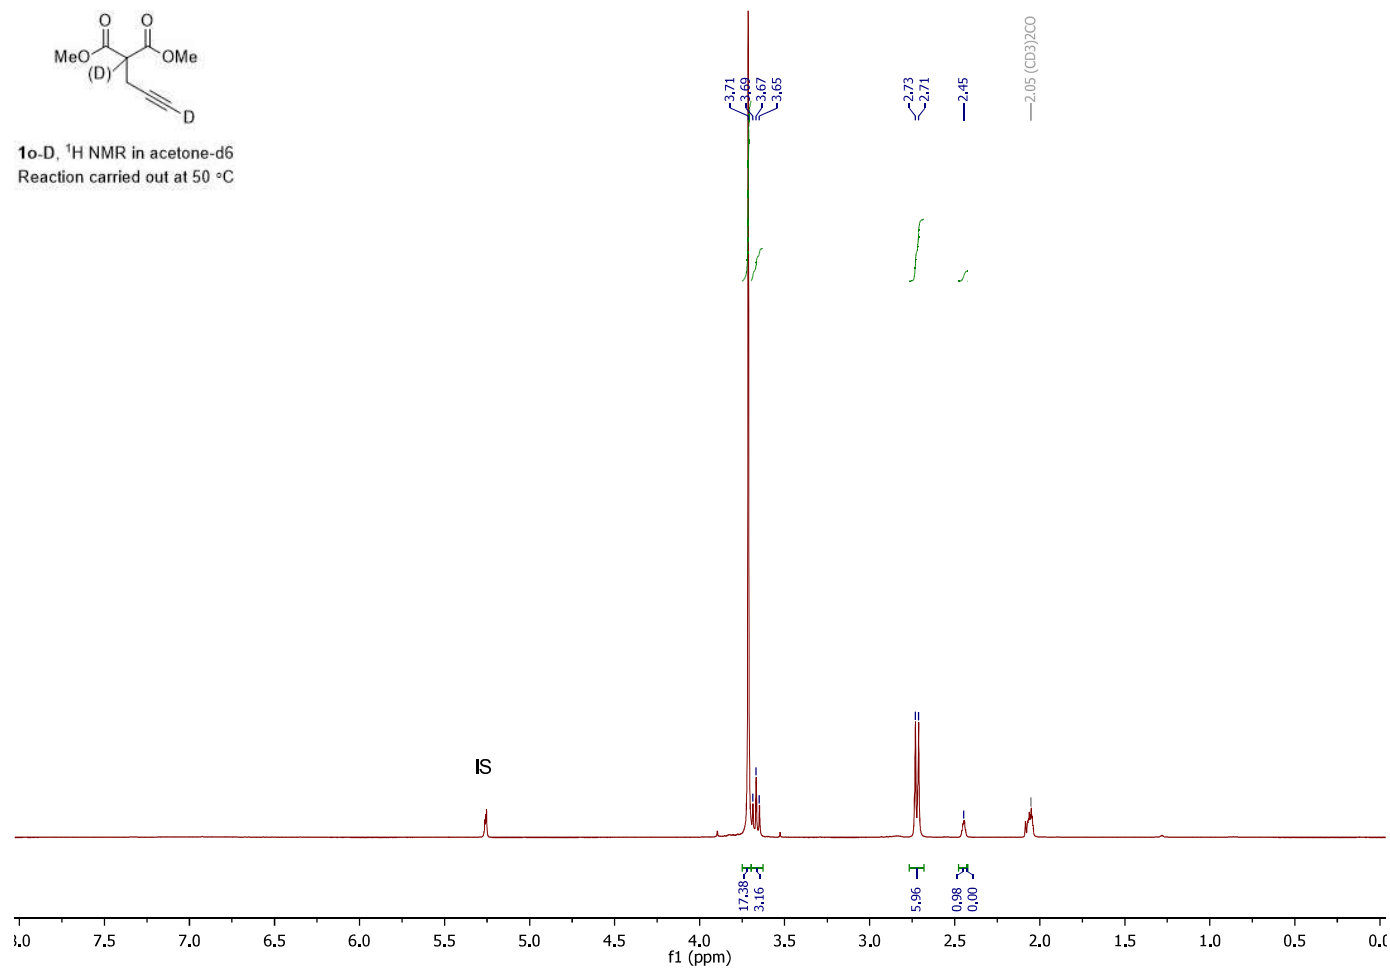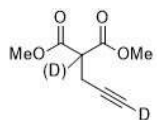

**1o-D**,  $^{13}\text{C}$  NMR in acetone- $d_6$   
Reaction carried out at 50 °C

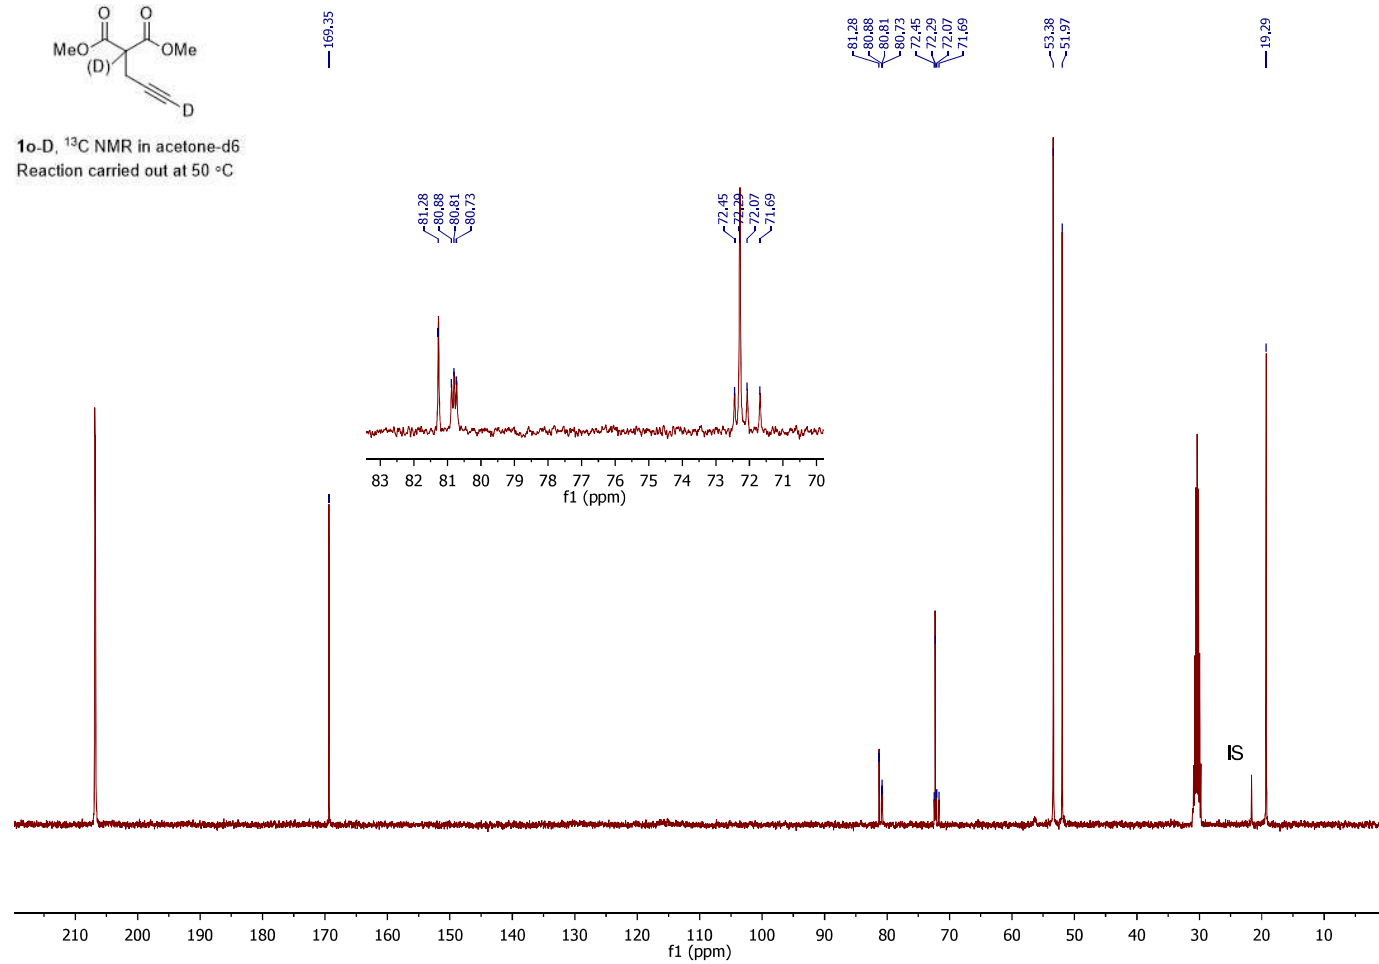



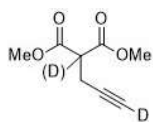

1o-D,  $^1\text{H}$  NMR in acetone- $d_6$   
Reaction carried out at 60 °C

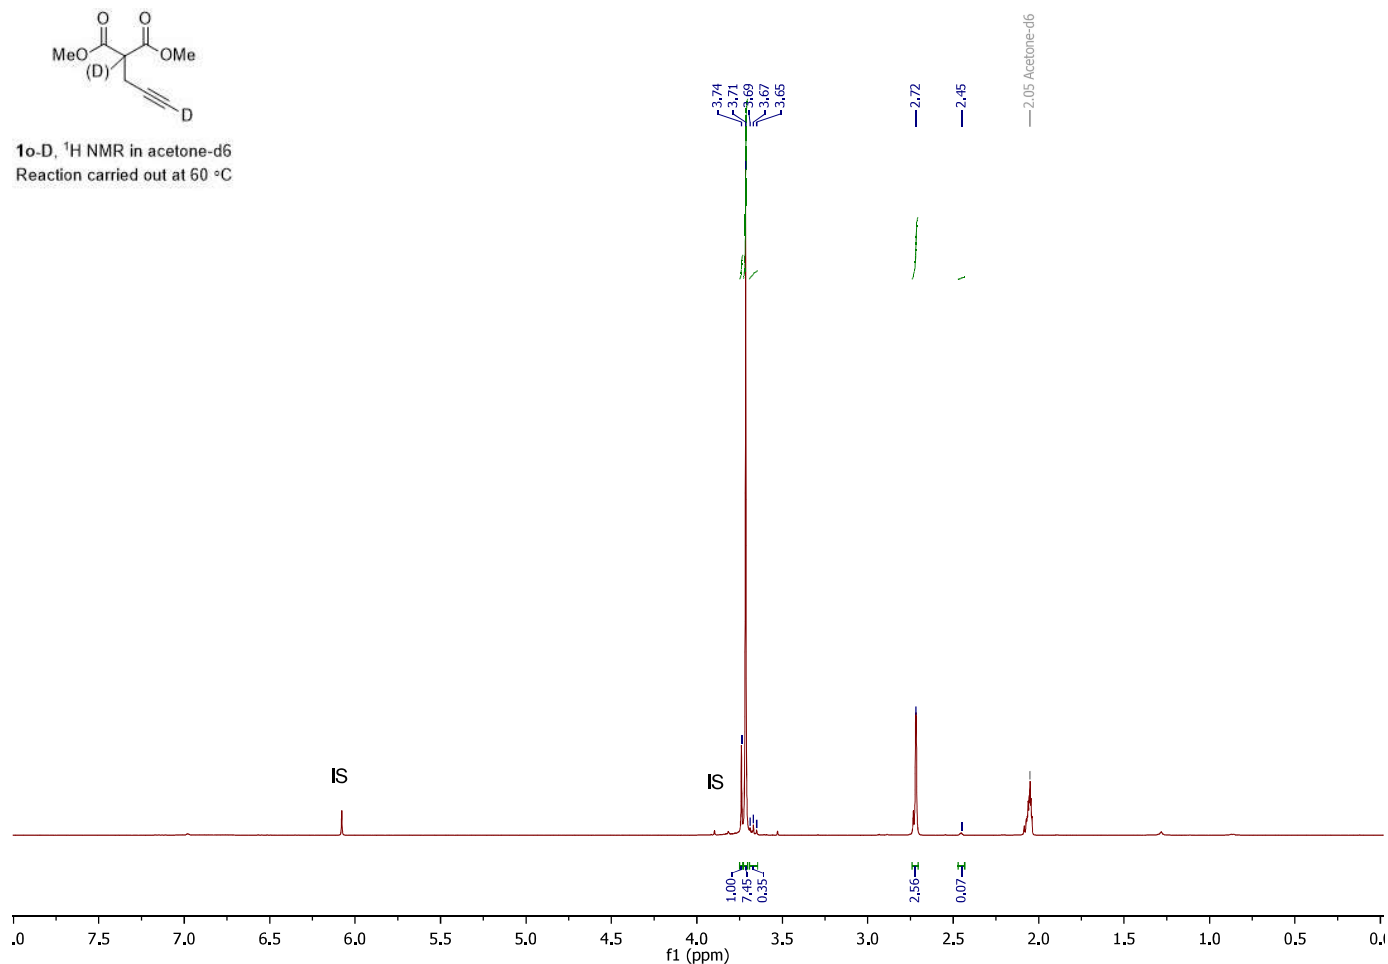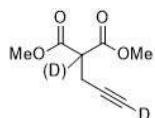

1o-D,  $^{13}\text{C}$  NMR in acetone- $d_6$   
Reaction carried out at 60 °C

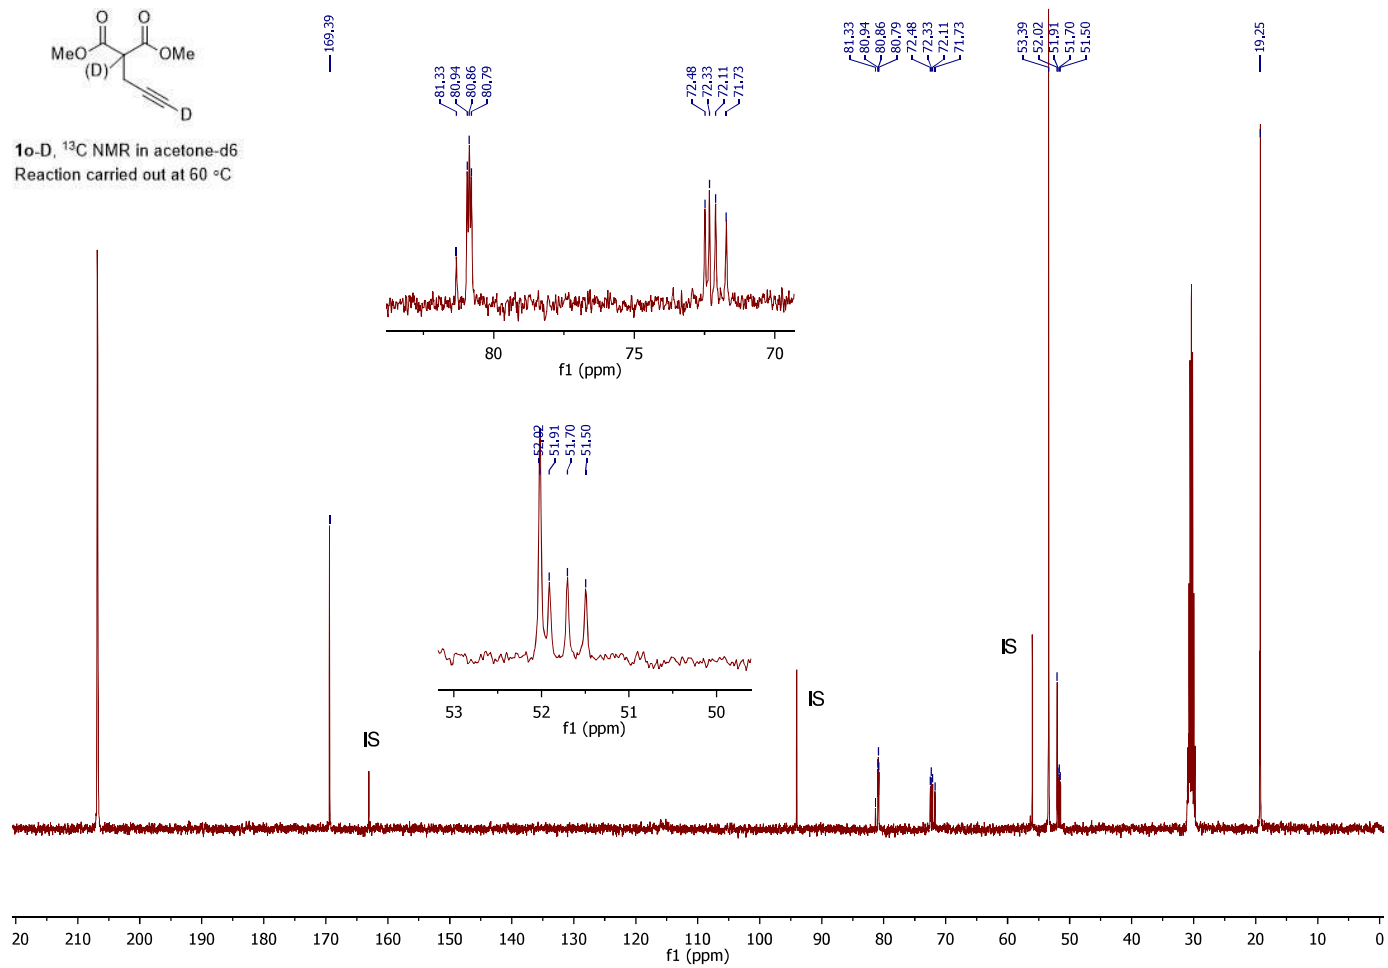

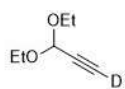

1p-D, <sup>1</sup>H NMR in acetone-d<sub>6</sub>

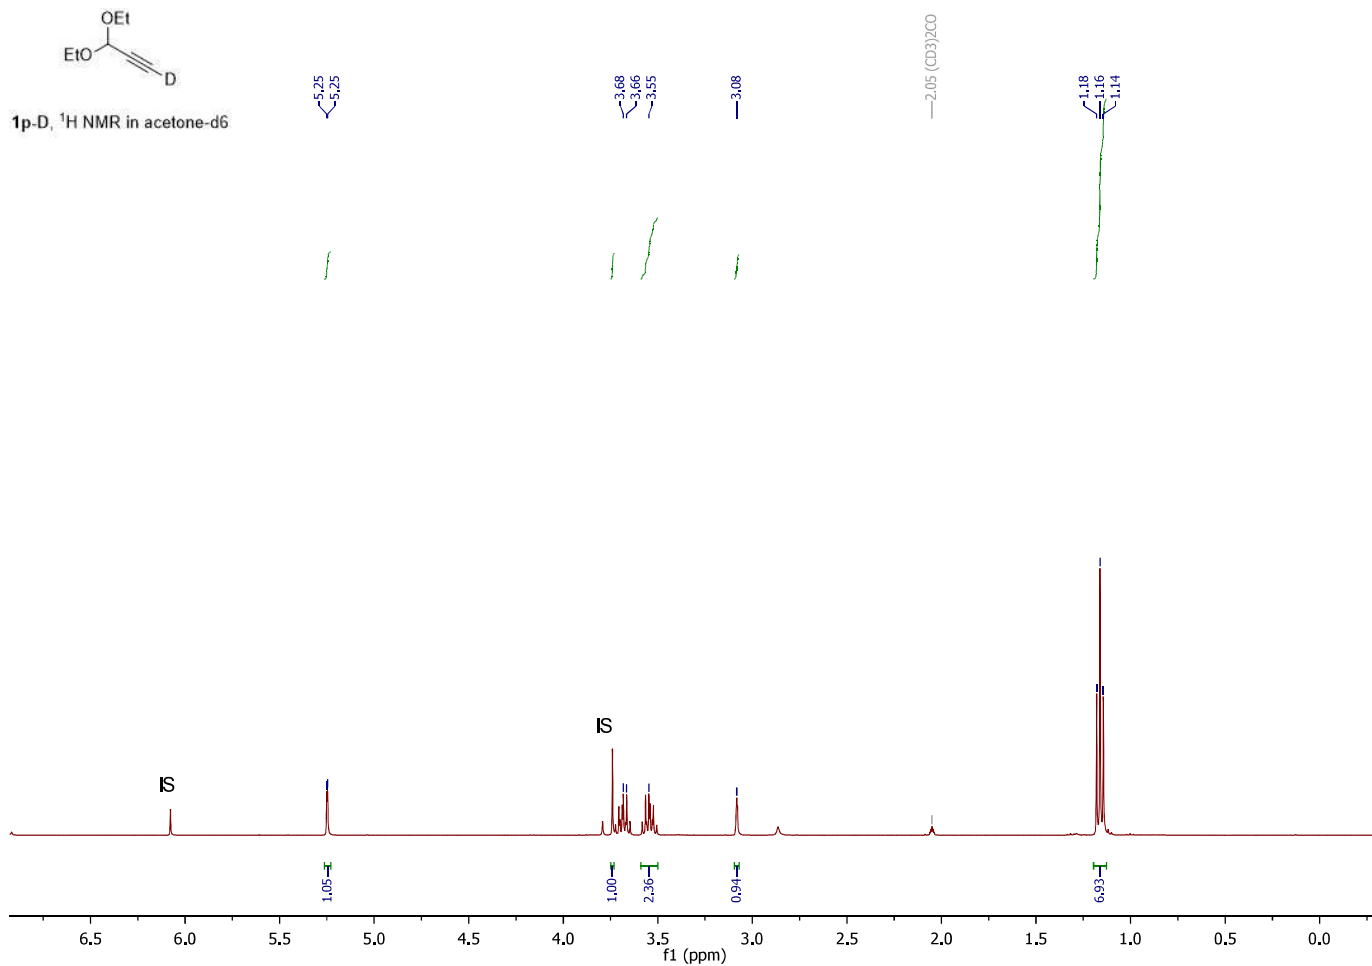

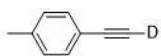

1q-D,  $^1\text{H}$  NMR in acetone- $d_6$

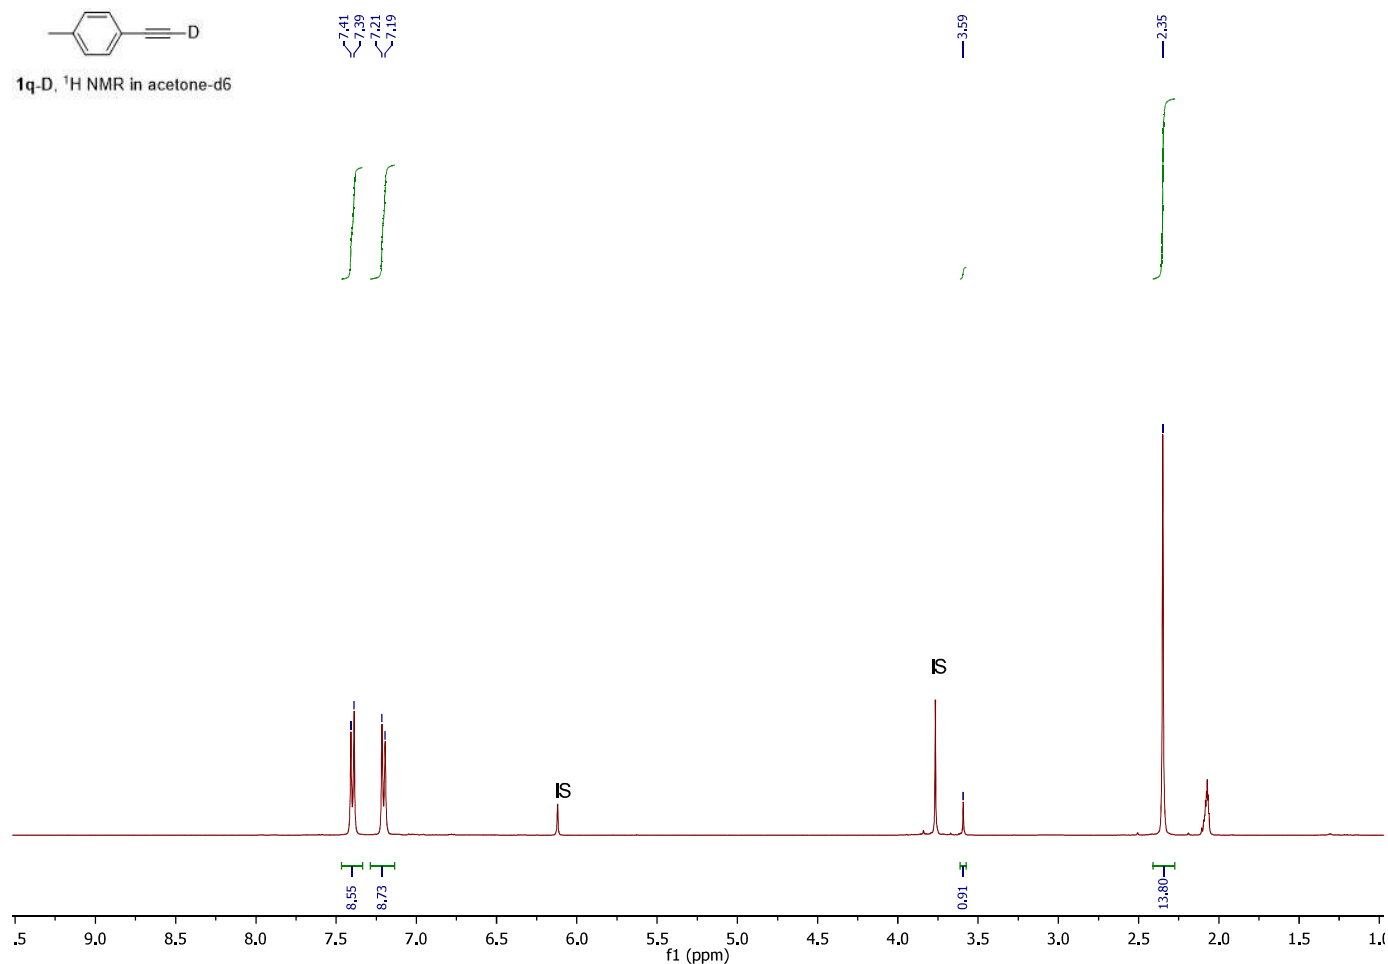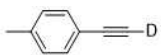

1q-D,  $^{13}\text{C}$  NMR in acetone- $d_6$

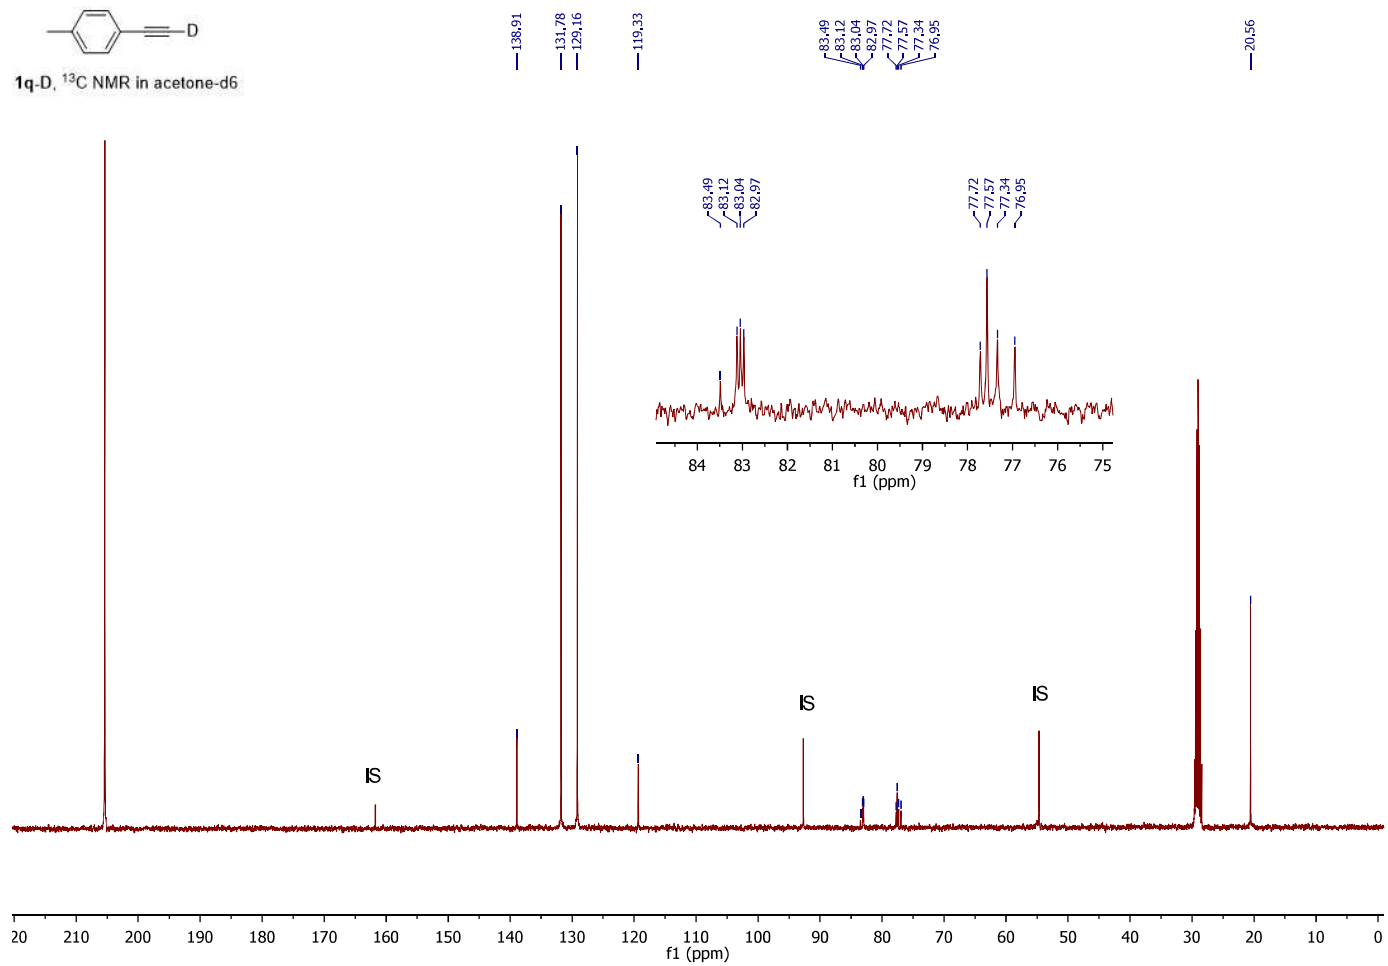

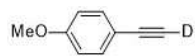

1r-D,  $^1\text{H}$  NMR in  $\text{CDCl}_3$

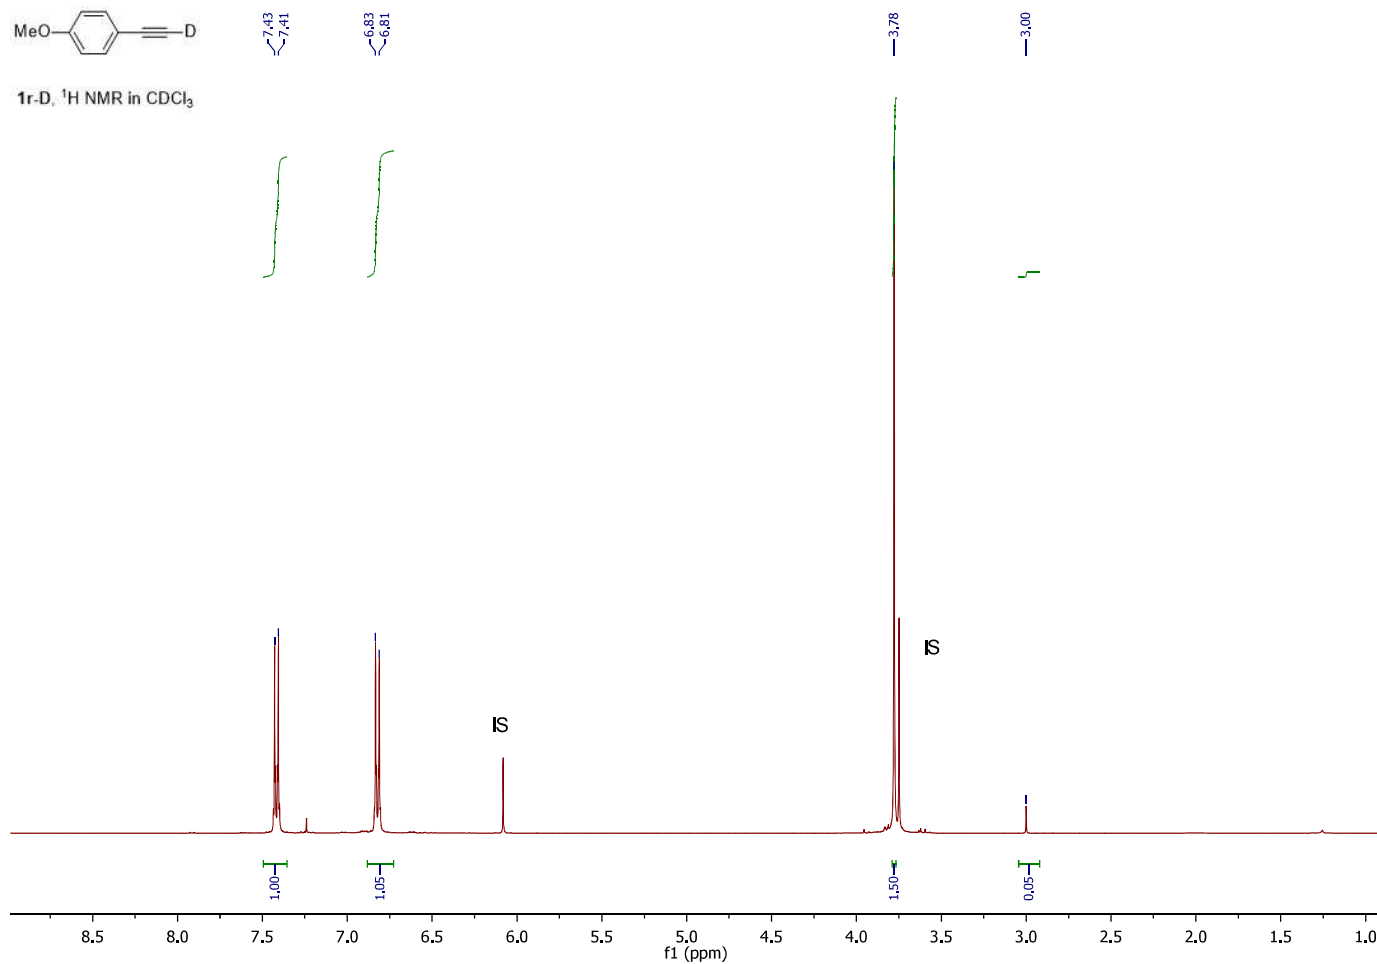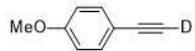

1r-D,  $^{13}\text{C}$  NMR in  $\text{CDCl}_3$

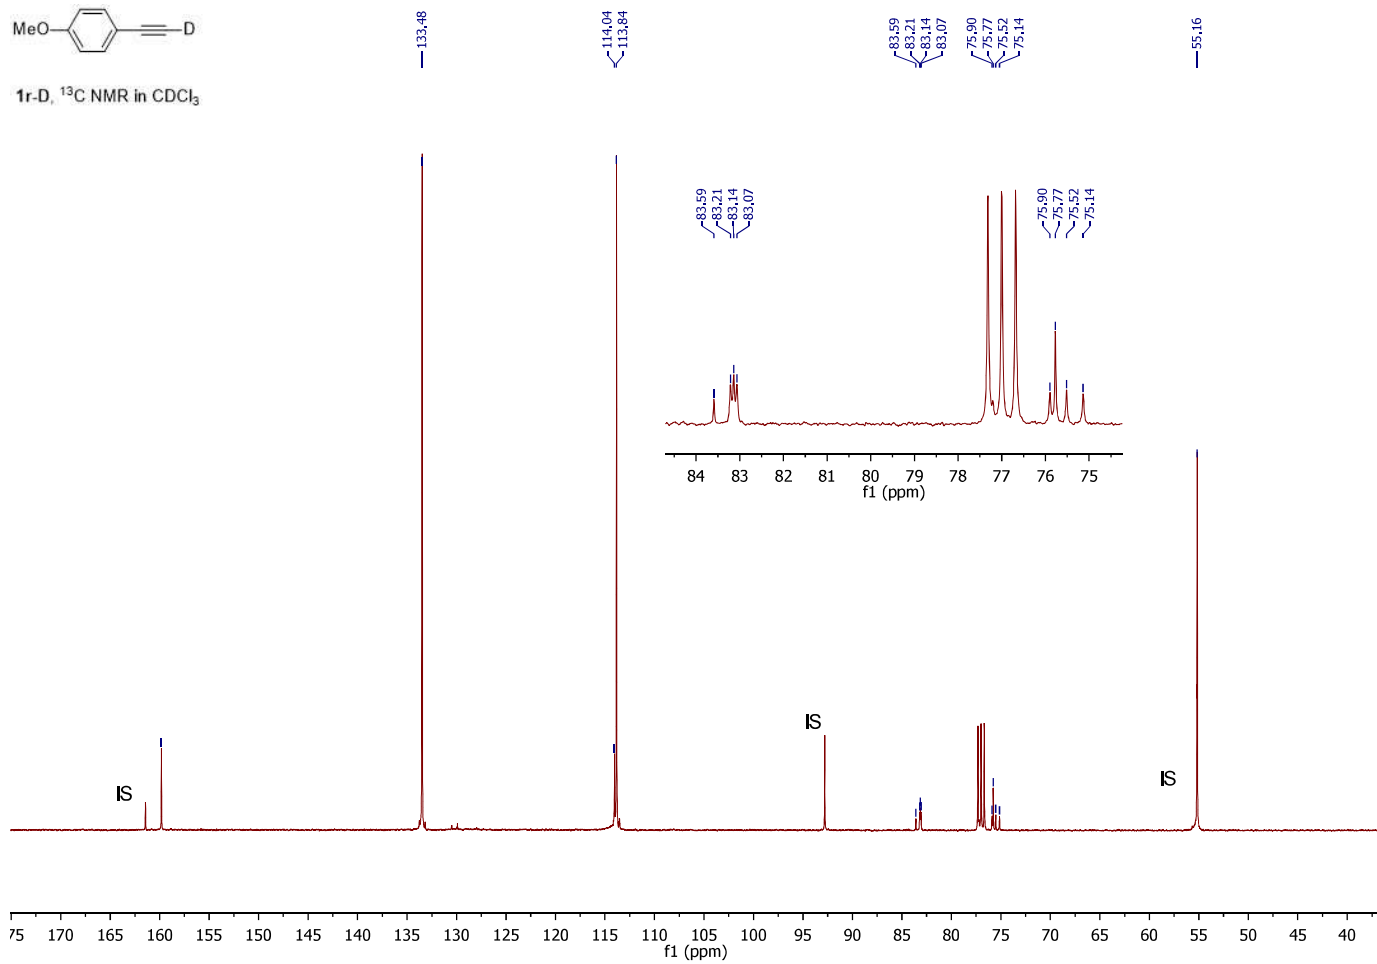

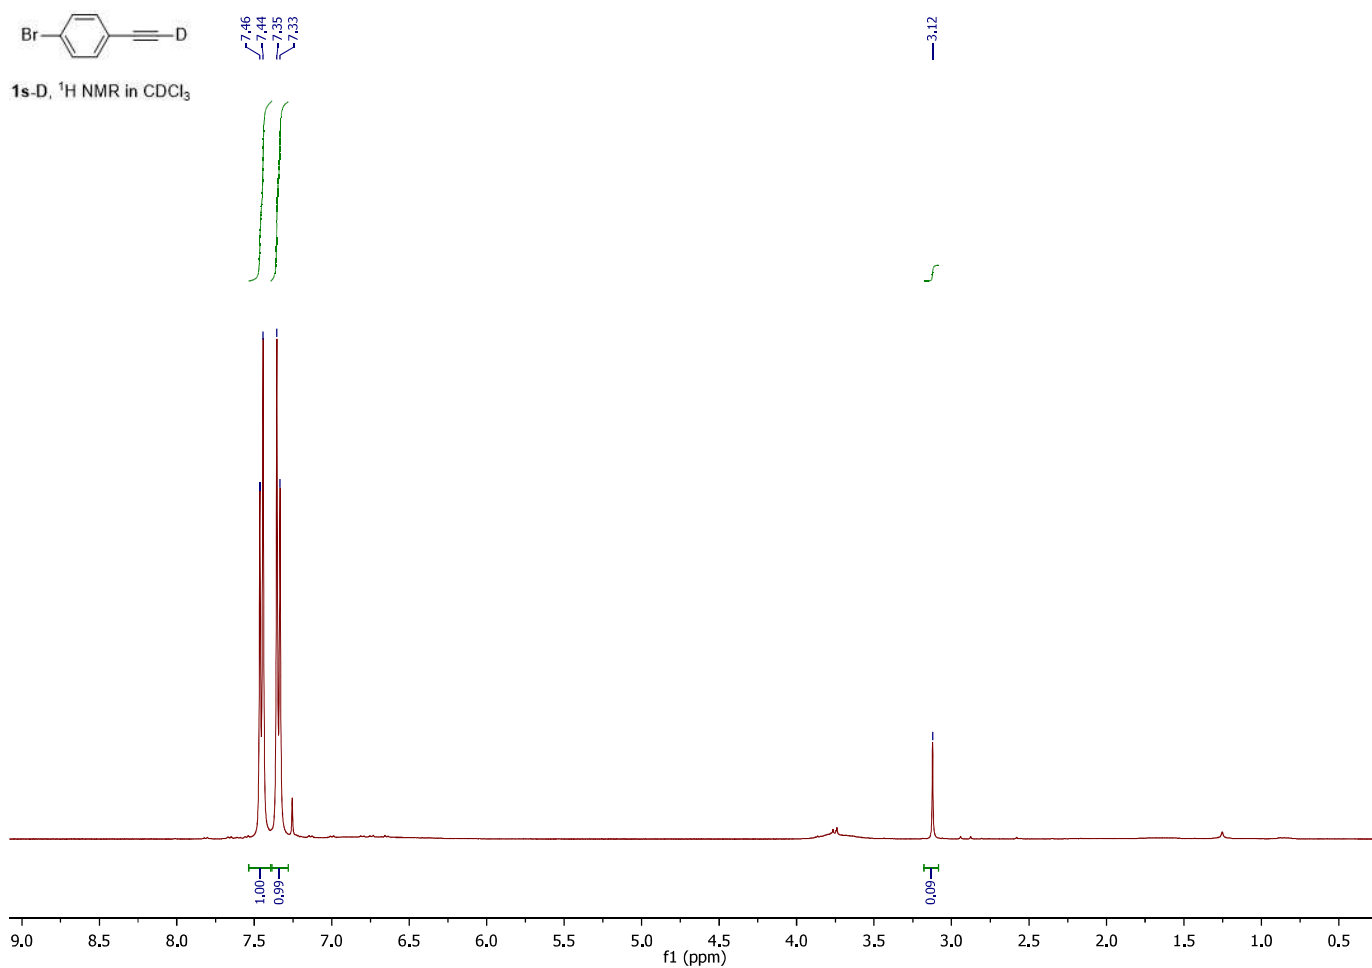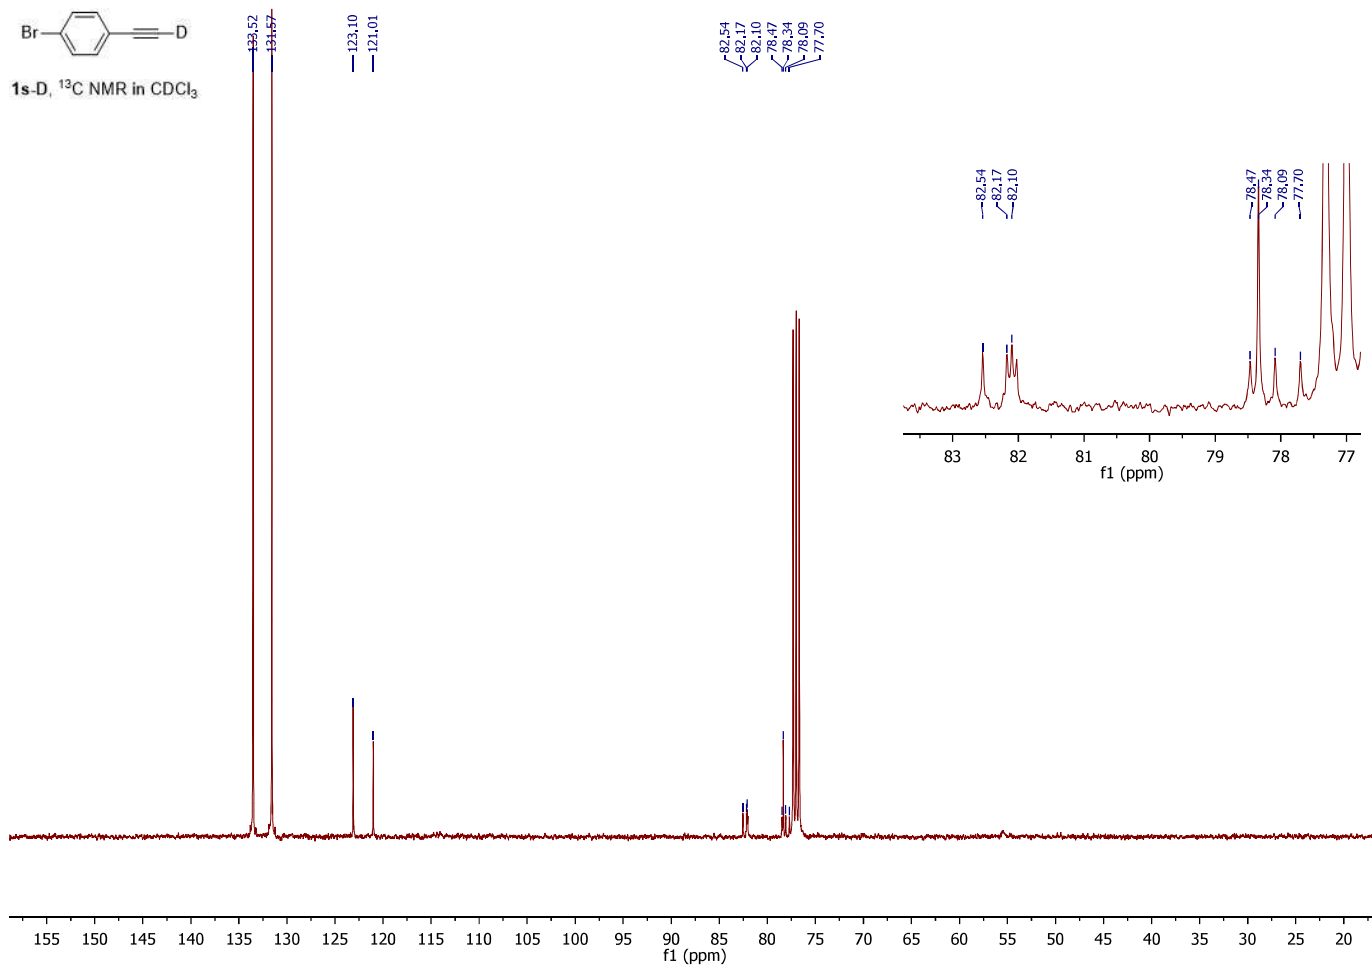

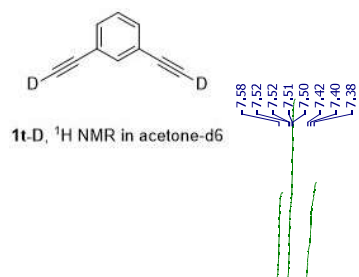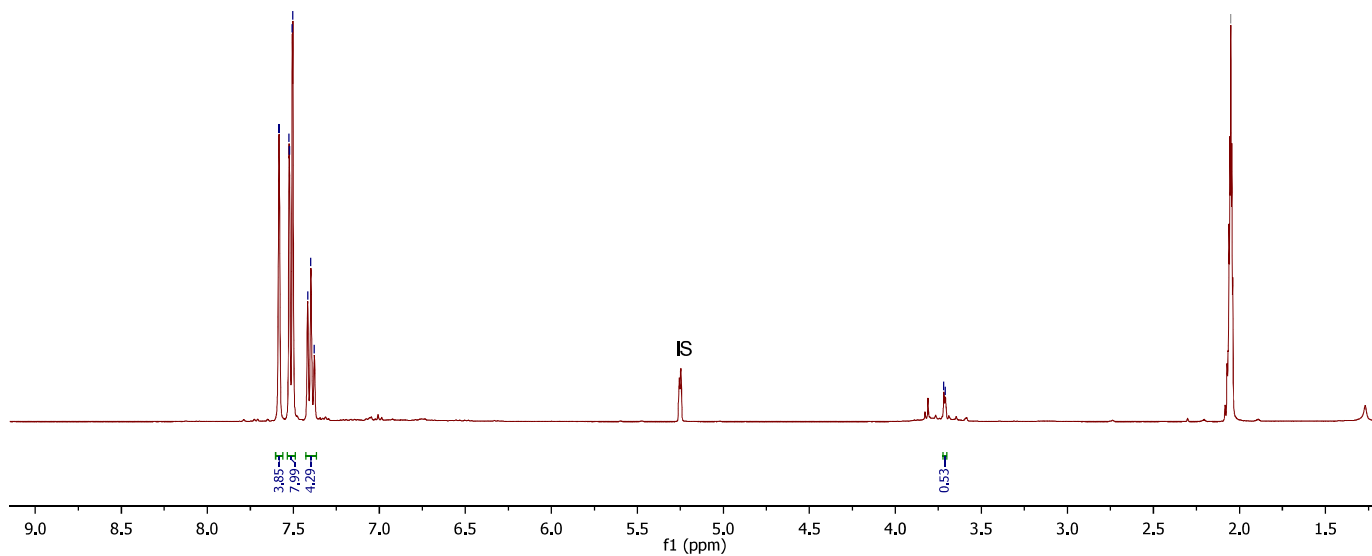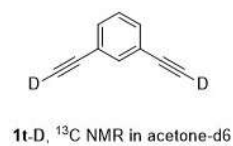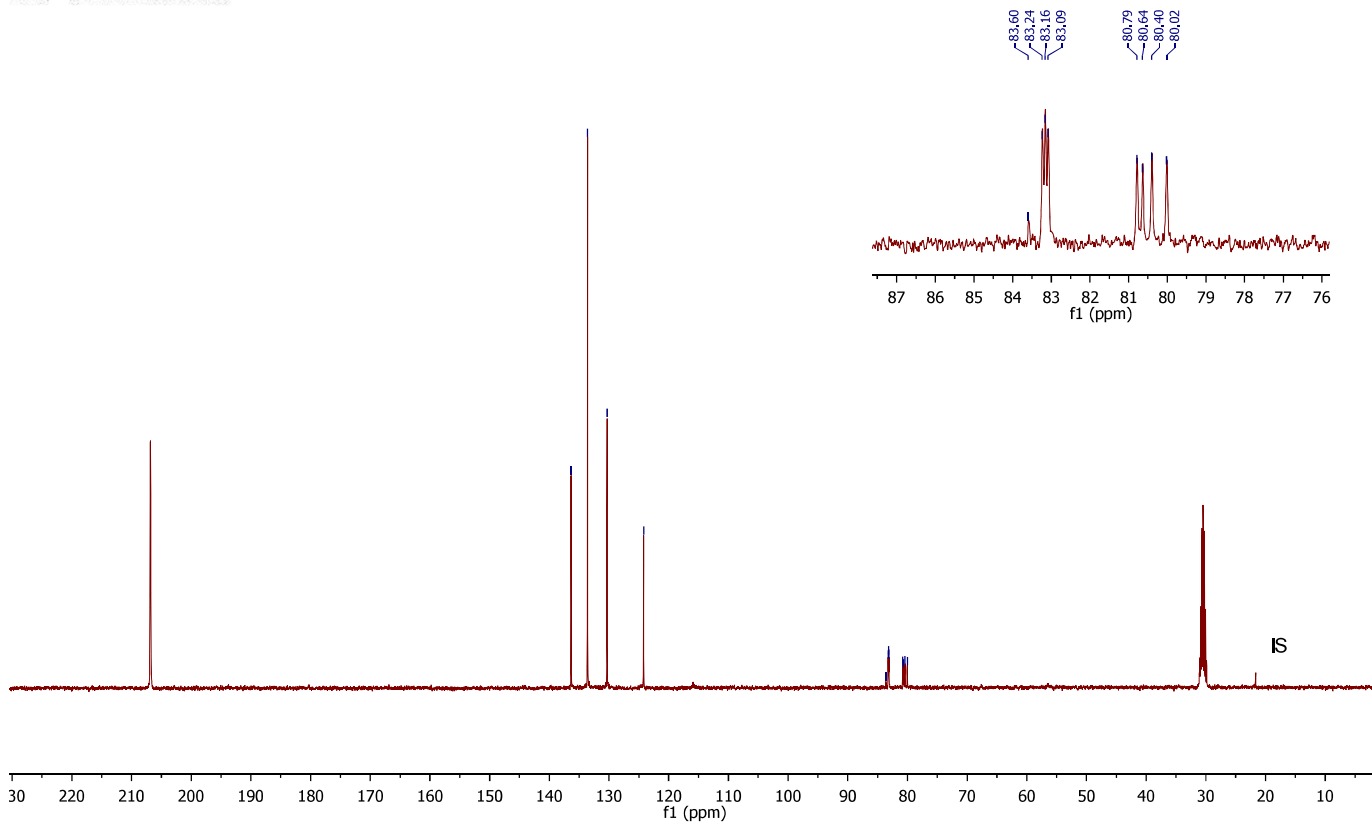

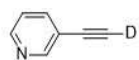

8.72

7.89  
7.87

7.43

3.90

1u-D, <sup>1</sup>H NMR in acetone-d<sub>6</sub>

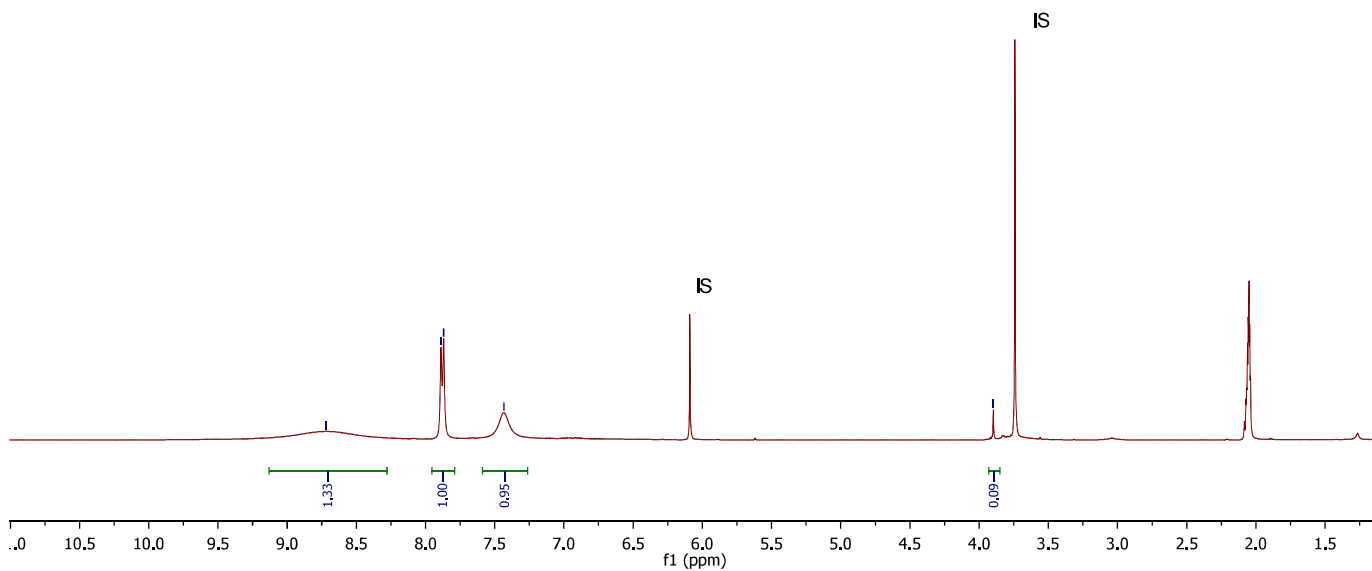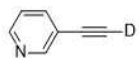

153.14

149.96

139.53

82.72  
82.58  
82.34  
81.95  
81.11  
80.69  
80.61

1u-D, <sup>13</sup>C NMR in acetone-d<sub>6</sub>

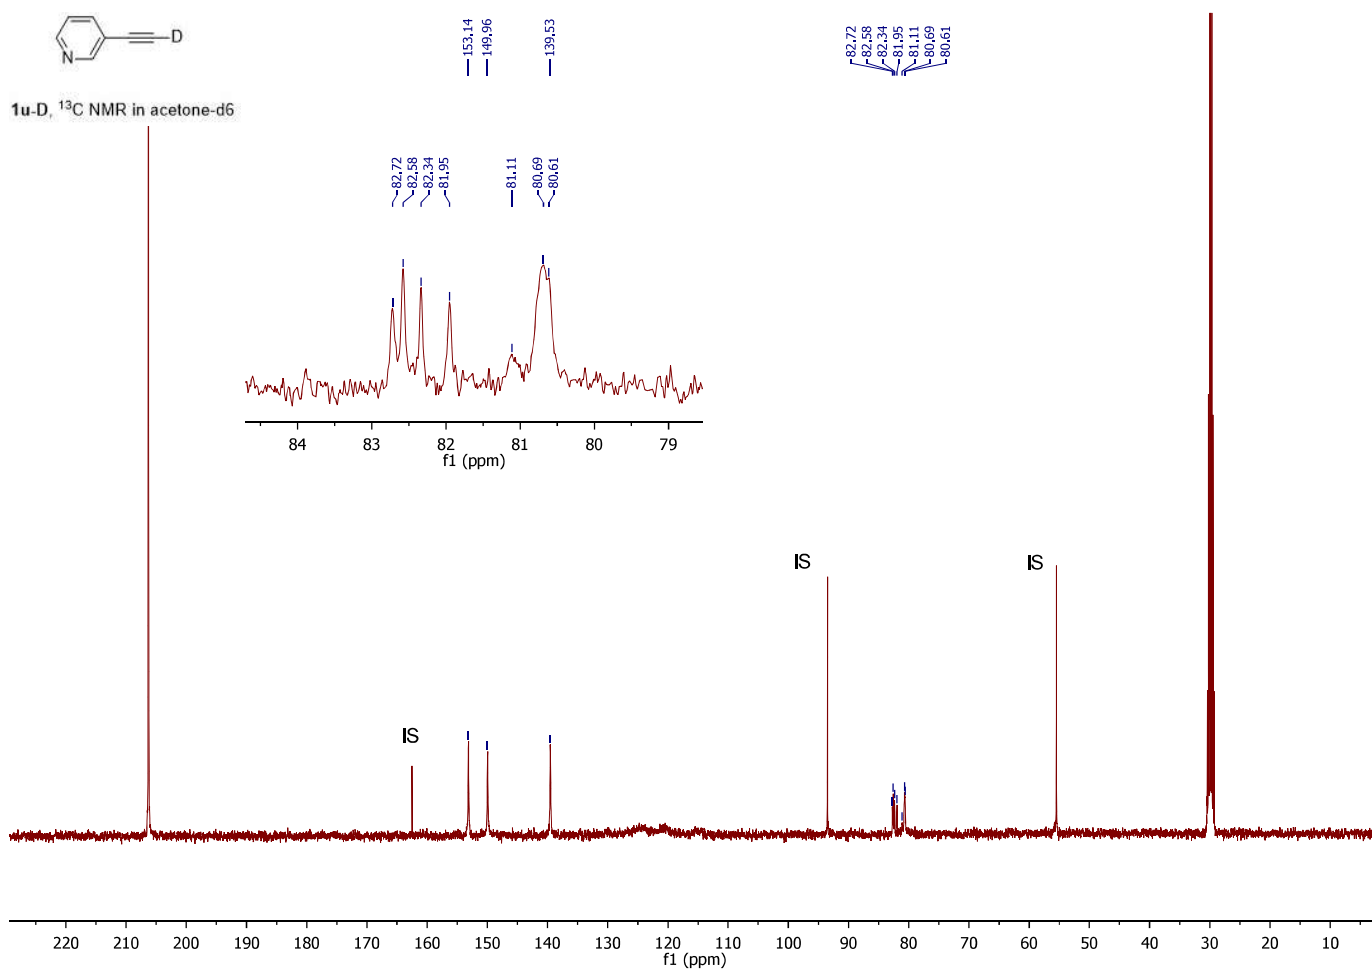

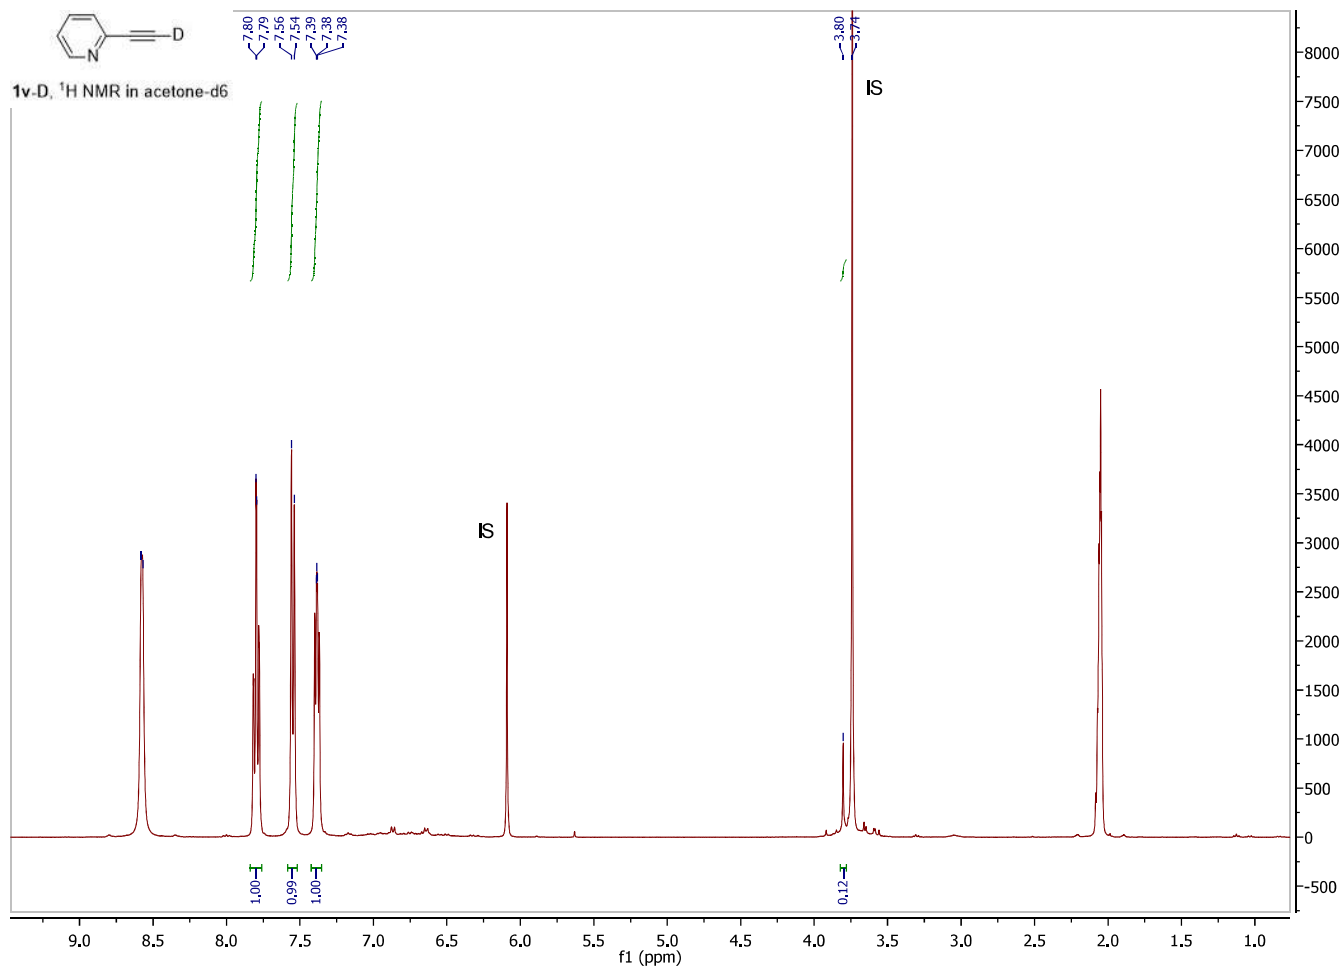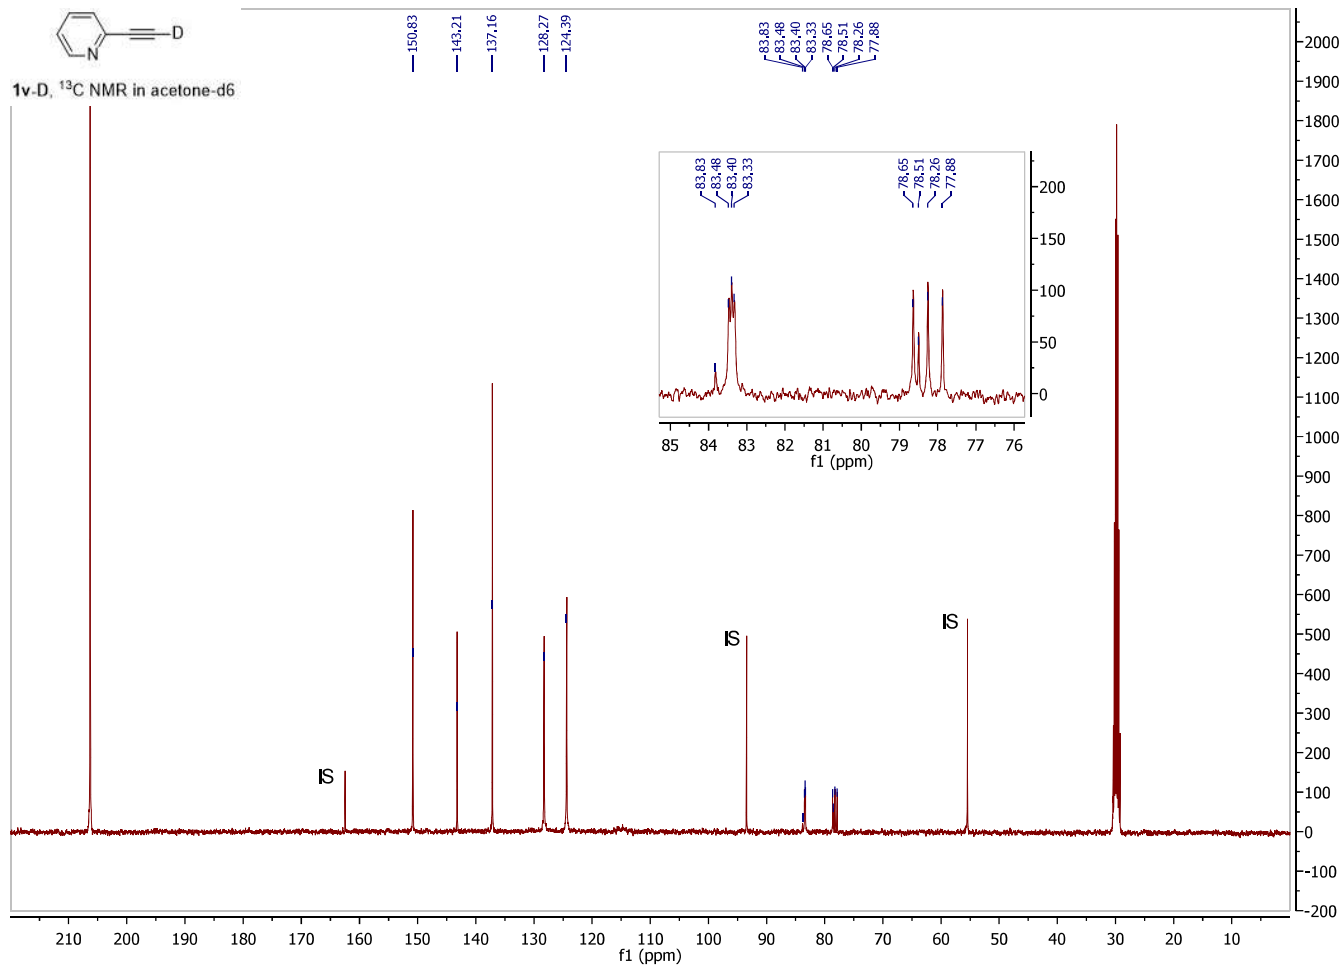



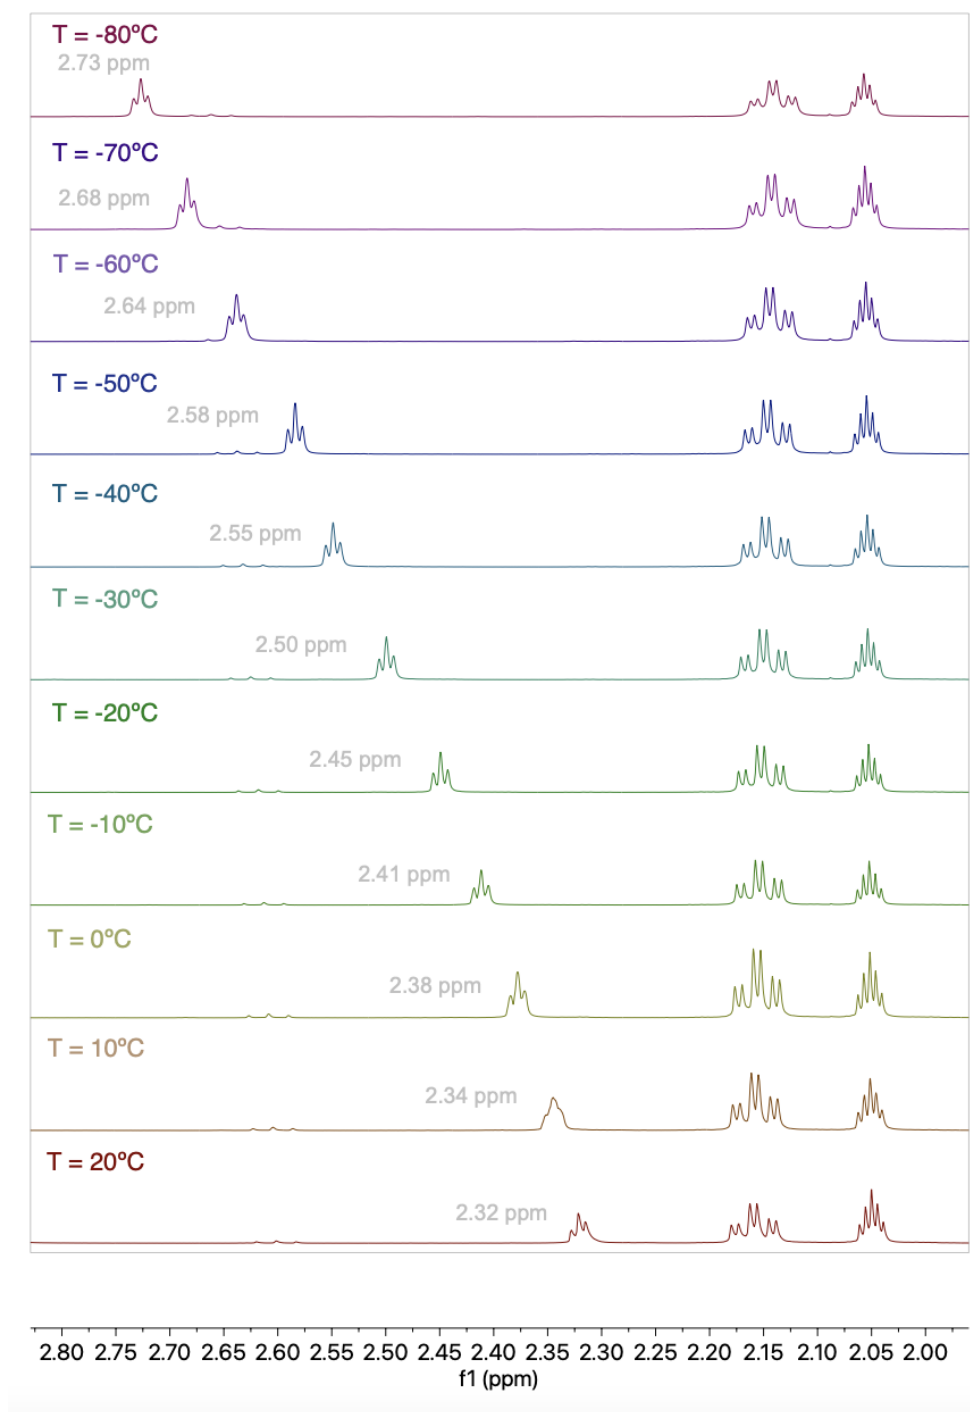

**Figure S1.** <sup>1</sup>H NMR spectra of an equimolar mixture of **1a** and [Cu(DAB<sup>Anis</sup>)<sub>2</sub>]BF<sub>4</sub> in acetone-d<sub>6</sub> at low temperatures

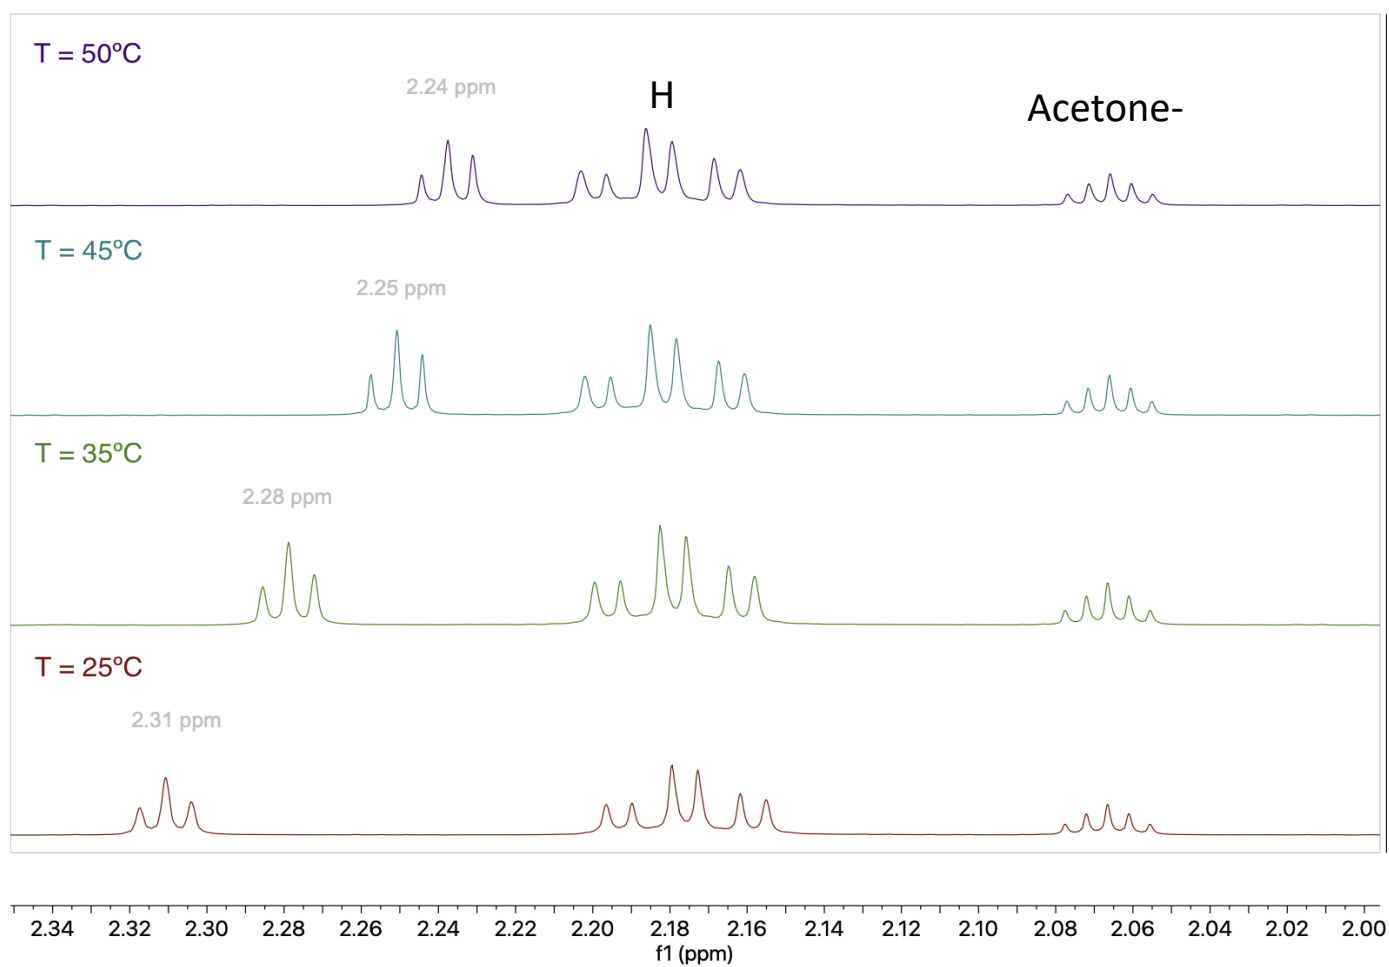

**Figure S2.**  $^1\text{H}$  NMR spectra of an equimolar mixture of **1a** and  $[\text{Cu}(\text{DAB}^{\text{Anis}})_2]\text{BF}_4$  in acetone- $\text{d}_6$  at higher temperatures
